# Supplementary material
Source: publisher figshare collection journal article supplement (https://acs.figshare.com/ndownloader/files/4669027)
Supplement: Supplementary file 1 [file 4669027]

###########################################################################
#
#	Sibert, J. W.; Forshee, P. B.; Hundt, G. R.; Sargent, A. L.; Bott, S. G.;
#	Lynch, V.  
#
#	" Wurster's Crowns:  A Comparative Study of ortho- and para-Phenylenediamine #	Containing Macrocyclic Receptors"
############################################################################
 
data_8�NaPF6 
 
_audit_creation_method            SHELXL-97 
_chemical_name_systematic 
; 
 ? 
; 
_chemical_name_common             ? 
_chemical_melting_point           ? 
_chemical_formula_moiety          ? 
_chemical_formula_sum 
 'C18 H30 F6 N2 Na O4 P' 
_chemical_formula_weight          506.40 
 
loop_ 
 _atom_type_symbol 
 _atom_type_description 
 _atom_type_scat_dispersion_real 
 _atom_type_scat_dispersion_imag 
 _atom_type_scat_source 
 'C'  'C'   0.0033   0.0016 
 'International Tables Vol C Tables 4.2.6.8 and 6.1.1.4' 
 'H'  'H'   0.0000   0.0000 
 'International Tables Vol C Tables 4.2.6.8 and 6.1.1.4' 
 'N'  'N'   0.0061   0.0033 
 'International Tables Vol C Tables 4.2.6.8 and 6.1.1.4' 
 'O'  'O'   0.0106   0.0060 
 'International Tables Vol C Tables 4.2.6.8 and 6.1.1.4' 
 'F'  'F'   0.0171   0.0103 
 'International Tables Vol C Tables 4.2.6.8 and 6.1.1.4' 
 'P'  'P'   0.1023   0.0942 
 'International Tables Vol C Tables 4.2.6.8 and 6.1.1.4' 
 'Na'  'Na'   0.0362   0.0249 
 'International Tables Vol C Tables 4.2.6.8 and 6.1.1.4' 
 
_symmetry_cell_setting            Monoclinic
_symmetry_space_group_name_H-M    P21/c
 
loop_ 
 _symmetry_equiv_pos_as_xyz 
 'x, y, z' 
 '-x, y+1/2, -z+1/2' 
 '-x, -y, -z' 
 'x, -y-1/2, z-1/2' 
 
_cell_length_a                    10.5135(2) 
_cell_length_b                    20.3407(3) 
_cell_length_c                    11.1139(2) 
_cell_angle_alpha                 90.00 
_cell_angle_beta                  103.114(1) 
_cell_angle_gamma                 90.00 
_cell_volume                      2314.75(7) 
_cell_formula_units_Z             4 
_cell_measurement_temperature     293(2) 
_cell_measurement_reflns_used     ? 
_cell_measurement_theta_min       ? 
_cell_measurement_theta_max       ? 
 
_exptl_crystal_description        'large prisms'
_exptl_crystal_colour             colorless
_exptl_crystal_size_max           0.42 
_exptl_crystal_size_mid           0.29 
_exptl_crystal_size_min           0.23 
_exptl_crystal_density_meas       ? 
_exptl_crystal_density_diffrn     1.453 
_exptl_crystal_density_method     'not measured' 
_exptl_crystal_F_000              1056 
_exptl_absorpt_coefficient_mu     0.213 
_exptl_absorpt_correction_type    none
_exptl_absorpt_correction_T_min   ?
_exptl_absorpt_correction_T_max   ?
_exptl_absorpt_process_details    ? 
 
_exptl_special_details 
; 
 ? 
; 
 
_diffrn_ambient_temperature       293(2) 
_diffrn_radiation_wavelength      0.71073 
_diffrn_radiation_type            MoK\a 
_diffrn_radiation_source          'fine-focus sealed tube' 
_diffrn_radiation_monochromator   graphite 
_diffrn_measurement_device_type   'Nonius Kappa CCD'
_diffrn_measurement_method        \w-scans
_diffrn_detector_area_resol_mean  ? 
_diffrn_standards_number          ? 
_diffrn_standards_interval_count  ? 
_diffrn_standards_interval_time   ? 
_diffrn_standards_decay_%         ? 
_diffrn_reflns_number             10041 
_diffrn_reflns_av_R_equivalents   0.0331 
_diffrn_reflns_av_sigmaI/netI     0.0501 
_diffrn_reflns_limit_h_min        -13 
_diffrn_reflns_limit_h_max        13 
_diffrn_reflns_limit_k_min        -26 
_diffrn_reflns_limit_k_max        26 
_diffrn_reflns_limit_l_min        -14 
_diffrn_reflns_limit_l_max        14 
_diffrn_reflns_theta_min          3.19 
_diffrn_reflns_theta_max          27.49 
_reflns_number_total              5297 
_reflns_number_gt                 3492 
_reflns_threshold_expression      >2sigma(I) 
_publ_section_references
;
Altomare A., Burla M.C., Camalli M., Cascarano G.L., Giacovazzo C., 
Guagliardi A., Moliterni A.G.G., Polidori G.,Spagna R. Sir97.  
(1999) J. Appl. Cryst. 32, 115-119.

Otwinowski, Z. and Minor, W.  (1997).  Methods in Enzymology,
276, Macromolecular Crystallography, part A, 307-326, C. W. Carter,
Jr. and R. M. Sweets, Eds., Academic Press.

Sheldrick, G. M.  (1998).  SHELXTL/PC.  Release 5.10.  Siemens 
Analytical X-ray Instruments, Inc., Madison, WI, USA.


;
_computing_data_collection        'Collect software, Nonius B.V. 1998'
_computing_cell_refinement        'Collect software, Nonius B.V. 1998'
_computing_data_reduction         
;
DENZO and Scalepack (Otwinoski and Minor, 1997)
;
_computing_structure_solution     
;

SIR97 - Altomare A., Burla M.C., Camalli M., Cascarano G.L., Giacovazzo C., 
Guagliardi A., Moliterni A.G.G., Polidori G.,Spagna R.
;
_computing_structure_refinement   'XL SHELXTL/PC, Siemens Analytical'
_computing_molecular_graphics     'XP SHELXTL/PC, Siemens Analytical' 
_computing_publication_material   ? 

 
_refine_special_details 
; 
 Refinement of F^2^ against ALL reflections.  The weighted R-factor wR and 
 goodness of fit S are based on F^2^, conventional R-factors R are based 
 on F, with F set to zero for negative F^2^. The threshold expression of 
 F^2^ > 2sigma(F^2^) is used only for calculating R-factors(gt) etc. and is 
 not relevant to the choice of reflections for refinement.  R-factors based 
 on F^2^ are statistically about twice as large as those based on F, and R- 
 factors based on ALL data will be even larger. 
; 
 
_refine_ls_structure_factor_coef  Fsqd  
_refine_ls_matrix_type            full 
_refine_ls_weighting_scheme       calc  
_refine_ls_weighting_details 
 'calc w=1/[\s^2^(Fo^2^)+(0.0496P)^2^+0.5741P] where P=(Fo^2^+2Fc^2^)/3' 
_atom_sites_solution_primary      direct 
_atom_sites_solution_secondary    difmap 
_atom_sites_solution_hydrogens    geom 
_refine_ls_hydrogen_treatment     mixed 
_refine_ls_extinction_method      SHELXL 
_refine_ls_extinction_coef        0.0075(14) 
_refine_ls_extinction_expression 
 'Fc^*^=kFc[1+0.001xFc^2^\l^3^/sin(2\q)]^-1/4^' 
_refine_ls_number_reflns          5297 
_refine_ls_number_parameters      353 
_refine_ls_number_restraints      426 
_refine_ls_R_factor_all           0.0844 
_refine_ls_R_factor_gt            0.0469 
_refine_ls_wR_factor_ref          0.1237 
_refine_ls_wR_factor_gt           0.1086 
_refine_ls_goodness_of_fit_ref    1.142 
_refine_ls_restrained_S_all       1.231 
_refine_ls_shift/su_max           0.020 
_refine_ls_shift/su_mean          0.003 
 
loop_ 
 _atom_site_label 
 _atom_site_type_symbol 
 _atom_site_fract_x 
 _atom_site_fract_y 
 _atom_site_fract_z 
 _atom_site_U_iso_or_equiv 
 _atom_site_adp_type 
 _atom_site_occupancy 
 _atom_site_symmetry_multiplicity 
 _atom_site_calc_flag 
 _atom_site_refinement_flags 
 _atom_site_disorder_assembly 
 _atom_site_disorder_group 
Na Na 0.34855(7) 0.11967(4) 0.44839(7) 0.0314(2) Uani 1 1 d . . . 
N1 N 0.29089(16) 0.06071(8) 0.62052(14) 0.0271(4) Uani 1 1 d . . . 
C2 C 0.4160(2) 0.05855(12) 0.71296(19) 0.0384(5) Uani 1 1 d . . . 
H2A H 0.4784 0.0326 0.6810 0.046 Uiso 1 1 calc R . . 
H2B H 0.4030 0.0373 0.7874 0.046 Uiso 1 1 calc R . . 
C3 C 0.4702(2) 0.12638(13) 0.74419(19) 0.0430(6) Uani 1 1 d . . . 
H3A H 0.4090 0.1519 0.7787 0.052 Uiso 1 1 calc R . . 
H3B H 0.5513 0.1233 0.8062 0.052 Uiso 1 1 calc R . . 
O4 O 0.49360(14) 0.15948(8) 0.63664(14) 0.0400(4) Uani 1 1 d . . . 
C5 C 0.6261(2) 0.15605(13) 0.6244(2) 0.0437(6) Uani 1 1 d . . . 
H5A H 0.6546 0.1106 0.6266 0.052 Uiso 1 1 calc R . . 
H5B H 0.6829 0.1796 0.6915 0.052 Uiso 1 1 calc R . . 
C6 C 0.6306(2) 0.18660(12) 0.5034(2) 0.0451(6) Uani 1 1 d . . . 
H6A H 0.5978 0.2313 0.4998 0.054 Uiso 1 1 calc R . . 
H6B H 0.7199 0.1878 0.4934 0.054 Uiso 1 1 calc R . . 
O7 O 0.55152(14) 0.14796(7) 0.40723(13) 0.0360(4) Uani 1 1 d . . . 
C8 C 0.5307(2) 0.17791(12) 0.2880(2) 0.0421(6) Uani 1 1 d . . . 
H8A H 0.6138 0.1875 0.2677 0.051 Uiso 1 1 calc R . . 
H8B H 0.4829 0.2188 0.2871 0.051 Uiso 1 1 calc R . . 
C9 C 0.4545(2) 0.13109(12) 0.1965(2) 0.0395(6) Uani 1 1 d . . . 
H9A H 0.4348 0.1508 0.1149 0.047 Uiso 1 1 calc R . . 
H9B H 0.5048 0.0914 0.1937 0.047 Uiso 1 1 calc R . . 
O10 O 0.33628(14) 0.11562(7) 0.23307(13) 0.0356(4) Uani 1 1 d . . . 
C11 C 0.2717(2) 0.05906(12) 0.17128(19) 0.0387(5) Uani 1 1 d . . . 
H11A H 0.3351 0.0250 0.1668 0.046 Uiso 1 1 calc R . . 
H11B H 0.2266 0.0705 0.0878 0.046 Uiso 1 1 calc R . . 
C12 C 0.1764(2) 0.03470(12) 0.24173(18) 0.0374(5) Uani 1 1 d . . . 
H12A H 0.1102 0.0678 0.2425 0.045 Uiso 1 1 calc R . . 
H12B H 0.1335 -0.0047 0.2032 0.045 Uiso 1 1 calc R . . 
O13 O 0.24595(13) 0.02065(7) 0.36475(12) 0.0326(4) Uani 1 1 d . . . 
C14 C 0.1649(2) -0.00278(11) 0.44323(19) 0.0341(5) Uani 1 1 d . . . 
H14A H 0.1311 -0.0461 0.4169 0.041 Uiso 1 1 calc R . . 
H14B H 0.0917 0.0267 0.4398 0.041 Uiso 1 1 calc R . . 
C15 C 0.2481(2) -0.00566(10) 0.57231(19) 0.0350(5) Uani 1 1 d . . . 
H15A H 0.1989 -0.0262 0.6262 0.042 Uiso 1 1 calc R . . 
H15B H 0.3244 -0.0326 0.5729 0.042 Uiso 1 1 calc R . . 
C16 C 0.18956(18) 0.09412(10) 0.66782(17) 0.0260(4) Uani 1 1 d . . . 
C17 C 0.12692(19) 0.15001(10) 0.60856(18) 0.0271(5) Uani 1 1 d . . . 
C18 C 0.0312(2) 0.18062(11) 0.65776(19) 0.0335(5) Uani 1 1 d . . . 
H18A H -0.0112 0.2176 0.6187 0.040 Uiso 1 1 calc R . . 
C19 C -0.0017(2) 0.15709(11) 0.7632(2) 0.0374(5) Uani 1 1 d . . . 
H19A H -0.0657 0.1781 0.7947 0.045 Uiso 1 1 calc R . . 
C20 C 0.0605(2) 0.10235(11) 0.82154(19) 0.0352(5) Uani 1 1 d . . . 
H20A H 0.0391 0.0864 0.8929 0.042 Uiso 1 1 calc R . . 
C21 C 0.1548(2) 0.07112(11) 0.77372(18) 0.0323(5) Uani 1 1 d . . . 
H21A H 0.1960 0.0339 0.8132 0.039 Uiso 1 1 calc R . . 
N22 N 0.16084(16) 0.17610(8) 0.49821(15) 0.0300(4) Uani 1 1 d . . . 
C23 C 0.2175(2) 0.24261(11) 0.5215(2) 0.0427(6) Uani 1 1 d . . . 
H23A H 0.1544 0.2716 0.5435 0.064 Uiso 1 1 calc R . . 
H23B H 0.2409 0.2586 0.4482 0.064 Uiso 1 1 calc R . . 
H23C H 0.2939 0.2408 0.5878 0.064 Uiso 1 1 calc R . . 
C24 C 0.0451(2) 0.17871(12) 0.39433(19) 0.0403(6) Uani 1 1 d . . . 
H24A H -0.0243 0.2014 0.4199 0.060 Uiso 1 1 calc R . . 
H24B H 0.0176 0.1348 0.3694 0.060 Uiso 1 1 calc R . . 
H24C H 0.0668 0.2016 0.3261 0.060 Uiso 1 1 calc R . . 
P1 P 0.80378(19) 0.13600(8) 1.06194(18) 0.0326(4) Uani 0.75 1 d PDU A 1 
F1 F 0.80277(18) 0.19882(9) 1.14700(16) 0.0431(4) Uani 0.75 1 d PDU A 1 
F2 F 0.8202(4) 0.09049(17) 1.1803(3) 0.0700(13) Uani 0.75 1 d PDU A 1 
F3 F 0.78792(19) 0.18204(12) 0.94366(16) 0.0577(6) Uani 0.75 1 d PDU A 1 
F4 F 0.9584(2) 0.14250(15) 1.0830(3) 0.0515(8) Uani 0.75 1 d PDU A 1 
F5 F 0.8065(3) 0.07375(12) 0.9766(2) 0.0766(7) Uani 0.75 1 d PDU A 1 
F6 F 0.65013(18) 0.13188(16) 1.04027(19) 0.0745(9) Uani 0.75 1 d PDU A 1 
P1A P 0.8002(6) 0.1122(2) 1.0570(5) 0.0380(15) Uani 0.25 1 d PDU B 2 
F1A F 0.7088(8) 0.1721(3) 1.0692(8) 0.113(3) Uani 0.25 1 d PDU B 2 
F2A F 0.8283(9) 0.1009(4) 1.2016(5) 0.051(3) Uani 0.25 1 d PDU B 2 
F3A F 0.8908(5) 0.0517(3) 1.0447(6) 0.0623(18) Uani 0.25 1 d PDU B 2 
F4A F 0.9240(7) 0.1600(4) 1.0753(8) 0.085(4) Uani 0.25 1 d PDU B 2 
F5A F 0.7758(5) 0.1241(4) 0.9121(4) 0.071(2) Uani 0.25 1 d PDU B 2 
F6A F 0.6777(5) 0.0643(3) 1.0368(5) 0.0686(18) Uani 0.25 1 d PDU B 2 
 
loop_ 
 _atom_site_aniso_label 
 _atom_site_aniso_U_11 
 _atom_site_aniso_U_22 
 _atom_site_aniso_U_33 
 _atom_site_aniso_U_23 
 _atom_site_aniso_U_13 
 _atom_site_aniso_U_12 
Na 0.0283(4) 0.0365(5) 0.0308(4) -0.0019(4) 0.0093(3) -0.0025(4) 
N1 0.0283(9) 0.0256(9) 0.0280(8) 0.0009(7) 0.0074(7) 0.0050(7) 
C2 0.0348(12) 0.0499(15) 0.0301(11) 0.0048(10) 0.0068(9) 0.0125(11) 
C3 0.0298(11) 0.0669(17) 0.0297(11) -0.0076(11) 0.0013(9) 0.0043(12) 
O4 0.0258(8) 0.0505(10) 0.0423(9) -0.0048(8) 0.0048(6) -0.0020(7) 
C5 0.0240(11) 0.0546(16) 0.0505(14) -0.0165(12) 0.0040(10) -0.0047(11) 
C6 0.0328(12) 0.0439(15) 0.0605(16) -0.0113(12) 0.0147(11) -0.0112(11) 
O7 0.0327(8) 0.0343(9) 0.0428(9) -0.0015(7) 0.0121(7) -0.0054(7) 
C8 0.0438(13) 0.0359(13) 0.0521(14) 0.0085(11) 0.0225(11) -0.0022(11) 
C9 0.0425(13) 0.0416(14) 0.0394(12) 0.0089(10) 0.0199(10) 0.0047(11) 
O10 0.0366(8) 0.0387(9) 0.0338(8) -0.0008(7) 0.0129(7) -0.0010(7) 
C11 0.0424(13) 0.0444(14) 0.0278(11) -0.0021(10) 0.0052(10) 0.0013(11) 
C12 0.0341(12) 0.0452(14) 0.0309(11) -0.0059(10) 0.0033(9) -0.0031(10) 
O13 0.0317(8) 0.0370(9) 0.0302(7) -0.0015(6) 0.0091(6) -0.0036(7) 
C14 0.0355(12) 0.0298(12) 0.0409(12) -0.0037(9) 0.0167(10) -0.0061(9) 
C15 0.0451(13) 0.0253(12) 0.0387(12) 0.0015(9) 0.0180(10) 0.0035(10) 
C16 0.0255(10) 0.0260(11) 0.0268(10) -0.0028(8) 0.0063(8) 0.0003(9) 
C17 0.0244(10) 0.0266(11) 0.0298(10) -0.0039(9) 0.0049(8) -0.0033(9) 
C18 0.0289(11) 0.0296(12) 0.0414(12) -0.0065(10) 0.0067(9) 0.0033(9) 
C19 0.0287(11) 0.0455(14) 0.0409(12) -0.0172(11) 0.0136(9) -0.0051(10) 
C20 0.0339(12) 0.0439(14) 0.0310(11) -0.0085(10) 0.0138(9) -0.0107(10) 
C21 0.0352(11) 0.0323(12) 0.0306(10) -0.0004(9) 0.0101(9) -0.0025(9) 
N22 0.0319(9) 0.0264(9) 0.0308(9) 0.0048(7) 0.0054(7) 0.0029(7) 
C23 0.0425(13) 0.0332(13) 0.0512(14) 0.0065(11) 0.0081(11) -0.0039(11) 
C24 0.0435(13) 0.0395(13) 0.0344(12) 0.0034(10) 0.0014(10) 0.0071(11) 
P1 0.0338(6) 0.0378(10) 0.0275(5) -0.0023(6) 0.0100(4) -0.0008(7) 
F1 0.0498(11) 0.0394(10) 0.0427(10) -0.0059(8) 0.0158(8) 0.0037(9) 
F2 0.121(3) 0.0375(15) 0.0540(17) 0.0161(15) 0.0262(18) -0.0020(17) 
F3 0.0560(12) 0.0860(16) 0.0353(10) 0.0194(11) 0.0195(9) 0.0175(12) 
F4 0.0331(11) 0.0743(18) 0.0468(13) -0.0046(12) 0.0086(9) 0.0136(12) 
F5 0.101(2) 0.0608(16) 0.0797(17) -0.0448(15) 0.0438(16) -0.0250(15) 
F6 0.0327(11) 0.149(3) 0.0460(12) -0.0314(15) 0.0171(9) -0.0309(14) 
P1A 0.039(2) 0.045(3) 0.033(2) 0.009(2) 0.0145(14) 0.006(2) 
F1A 0.145(8) 0.083(6) 0.142(7) 0.053(5) 0.098(6) 0.080(6) 
F2A 0.065(5) 0.066(6) 0.025(4) -0.012(3) 0.014(3) -0.028(4) 
F3A 0.055(4) 0.067(4) 0.076(4) 0.014(3) 0.036(3) 0.017(3) 
F4A 0.096(7) 0.063(6) 0.097(6) -0.007(5) 0.027(5) -0.065(6) 
F5A 0.044(3) 0.130(6) 0.041(3) 0.037(4) 0.013(3) 0.016(4) 
F6A 0.044(3) 0.102(5) 0.062(4) -0.005(4) 0.016(3) -0.023(4) 
 
_geom_special_details 
; 
 All esds (except the esd in the dihedral angle between two l.s. planes) 
 are estimated using the full covariance matrix.  The cell esds are taken 
 into account individually in the estimation of esds in distances, angles 
 and torsion angles; correlations between esds in cell parameters are only 
 used when they are defined by crystal symmetry.  An approximate (isotropic) 
 treatment of cell esds is used for estimating esds involving l.s. planes. 
; 
 
loop_ 
 _geom_bond_atom_site_label_1 
 _geom_bond_atom_site_label_2 
 _geom_bond_distance 
 _geom_bond_site_symmetry_2 
 _geom_bond_publ_flag 
Na O7 2.3531(16) . ? 
Na O10 2.3686(16) . ? 
Na O13 2.3727(16) . ? 
Na O4 2.4311(16) . ? 
Na N1 2.4478(18) . ? 
Na N22 2.4524(19) . ? 
N1 C16 1.459(2) . ? 
N1 C2 1.474(3) . ? 
N1 C15 1.484(3) . ? 
C2 C3 1.503(3) . ? 
C2 H2A 0.9700 . ? 
C2 H2B 0.9700 . ? 
C3 O4 1.441(3) . ? 
C3 H3A 0.9700 . ? 
C3 H3B 0.9700 . ? 
O4 C5 1.431(3) . ? 
C5 C6 1.493(3) . ? 
C5 H5A 0.9700 . ? 
C5 H5B 0.9700 . ? 
C6 O7 1.431(3) . ? 
C6 H6A 0.9700 . ? 
C6 H6B 0.9700 . ? 
O7 C8 1.430(3) . ? 
C8 C9 1.487(3) . ? 
C8 H8A 0.9700 . ? 
C8 H8B 0.9700 . ? 
C9 O10 1.427(3) . ? 
C9 H9A 0.9700 . ? 
C9 H9B 0.9700 . ? 
O10 C11 1.430(3) . ? 
C11 C12 1.490(3) . ? 
C11 H11A 0.9700 . ? 
C11 H11B 0.9700 . ? 
C12 O13 1.426(2) . ? 
C12 H12A 0.9700 . ? 
C12 H12B 0.9700 . ? 
O13 C14 1.432(2) . ? 
C14 C15 1.502(3) . ? 
C14 H14A 0.9700 . ? 
C14 H14B 0.9700 . ? 
C15 H15A 0.9700 . ? 
C15 H15B 0.9700 . ? 
C16 C21 1.390(3) . ? 
C16 C17 1.401(3) . ? 
C17 C18 1.396(3) . ? 
C17 N22 1.453(3) . ? 
C18 C19 1.381(3) . ? 
C18 H18A 0.9300 . ? 
C19 C20 1.377(3) . ? 
C19 H19A 0.9300 . ? 
C20 C21 1.382(3) . ? 
C20 H20A 0.9300 . ? 
C21 H21A 0.9300 . ? 
N22 C24 1.476(3) . ? 
N22 C23 1.477(3) . ? 
C23 H23A 0.9600 . ? 
C23 H23B 0.9600 . ? 
C23 H23C 0.9600 . ? 
C24 H24A 0.9600 . ? 
C24 H24B 0.9600 . ? 
C24 H24C 0.9600 . ? 
P1 F6 1.580(3) . ? 
P1 F2 1.585(3) . ? 
P1 F5 1.586(2) . ? 
P1 F1 1.591(2) . ? 
P1 F3 1.592(2) . ? 
P1 F4 1.594(3) . ? 
P1A F1A 1.577(5) . ? 
P1A F3A 1.581(5) . ? 
P1A F2A 1.584(6) . ? 
P1A F6A 1.590(6) . ? 
P1A F5A 1.591(6) . ? 
P1A F4A 1.600(6) . ? 
 
loop_ 
 _geom_angle_atom_site_label_1 
 _geom_angle_atom_site_label_2 
 _geom_angle_atom_site_label_3 
 _geom_angle 
 _geom_angle_site_symmetry_1 
 _geom_angle_site_symmetry_3 
 _geom_angle_publ_flag 
O7 Na O10 69.88(5) . . ? 
O7 Na O13 118.89(6) . . ? 
O10 Na O13 70.06(5) . . ? 
O7 Na O4 70.52(5) . . ? 
O10 Na O4 139.53(6) . . ? 
O13 Na O4 139.51(6) . . ? 
O7 Na N1 131.92(6) . . ? 
O10 Na N1 143.72(6) . . ? 
O13 Na N1 73.68(6) . . ? 
O4 Na N1 73.07(6) . . ? 
O7 Na N22 137.83(6) . . ? 
O10 Na N22 112.47(6) . . ? 
O13 Na N22 99.68(6) . . ? 
O4 Na N22 91.70(6) . . ? 
N1 Na N22 72.44(6) . . ? 
C16 N1 C2 111.82(15) . . ? 
C16 N1 C15 111.57(16) . . ? 
C2 N1 C15 111.95(17) . . ? 
C16 N1 Na 112.58(12) . . ? 
C2 N1 Na 102.67(12) . . ? 
C15 N1 Na 105.79(11) . . ? 
N1 C2 C3 111.40(18) . . ? 
N1 C2 H2A 109.3 . . ? 
C3 C2 H2A 109.3 . . ? 
N1 C2 H2B 109.3 . . ? 
C3 C2 H2B 109.3 . . ? 
H2A C2 H2B 108.0 . . ? 
O4 C3 C2 111.38(17) . . ? 
O4 C3 H3A 109.4 . . ? 
C2 C3 H3A 109.4 . . ? 
O4 C3 H3B 109.4 . . ? 
C2 C3 H3B 109.4 . . ? 
H3A C3 H3B 108.0 . . ? 
C5 O4 C3 114.16(17) . . ? 
C5 O4 Na 109.62(12) . . ? 
C3 O4 Na 111.49(12) . . ? 
O4 C5 C6 107.24(19) . . ? 
O4 C5 H5A 110.3 . . ? 
C6 C5 H5A 110.3 . . ? 
O4 C5 H5B 110.3 . . ? 
C6 C5 H5B 110.3 . . ? 
H5A C5 H5B 108.5 . . ? 
O7 C6 C5 108.18(18) . . ? 
O7 C6 H6A 110.1 . . ? 
C5 C6 H6A 110.1 . . ? 
O7 C6 H6B 110.1 . . ? 
C5 C6 H6B 110.1 . . ? 
H6A C6 H6B 108.4 . . ? 
C8 O7 C6 113.50(17) . . ? 
C8 O7 Na 109.25(12) . . ? 
C6 O7 Na 112.84(13) . . ? 
O7 C8 C9 107.81(18) . . ? 
O7 C8 H8A 110.1 . . ? 
C9 C8 H8A 110.1 . . ? 
O7 C8 H8B 110.1 . . ? 
C9 C8 H8B 110.1 . . ? 
H8A C8 H8B 108.5 . . ? 
O10 C9 C8 108.40(18) . . ? 
O10 C9 H9A 110.0 . . ? 
C8 C9 H9A 110.0 . . ? 
O10 C9 H9B 110.0 . . ? 
C8 C9 H9B 110.0 . . ? 
H9A C9 H9B 108.4 . . ? 
C9 O10 C11 112.95(16) . . ? 
C9 O10 Na 115.37(12) . . ? 
C11 O10 Na 115.11(12) . . ? 
O10 C11 C12 108.54(17) . . ? 
O10 C11 H11A 110.0 . . ? 
C12 C11 H11A 110.0 . . ? 
O10 C11 H11B 110.0 . . ? 
C12 C11 H11B 110.0 . . ? 
H11A C11 H11B 108.4 . . ? 
O13 C12 C11 108.10(17) . . ? 
O13 C12 H12A 110.1 . . ? 
C11 C12 H12A 110.1 . . ? 
O13 C12 H12B 110.1 . . ? 
C11 C12 H12B 110.1 . . ? 
H12A C12 H12B 108.4 . . ? 
C12 O13 C14 113.83(16) . . ? 
C12 O13 Na 107.12(12) . . ? 
C14 O13 Na 108.92(11) . . ? 
O13 C14 C15 107.25(17) . . ? 
O13 C14 H14A 110.3 . . ? 
C15 C14 H14A 110.3 . . ? 
O13 C14 H14B 110.3 . . ? 
C15 C14 H14B 110.3 . . ? 
H14A C14 H14B 108.5 . . ? 
N1 C15 C14 111.85(17) . . ? 
N1 C15 H15A 109.2 . . ? 
C14 C15 H15A 109.2 . . ? 
N1 C15 H15B 109.2 . . ? 
C14 C15 H15B 109.2 . . ? 
H15A C15 H15B 107.9 . . ? 
C21 C16 C17 119.05(18) . . ? 
C21 C16 N1 120.12(18) . . ? 
C17 C16 N1 120.83(17) . . ? 
C18 C17 C16 118.78(18) . . ? 
C18 C17 N22 120.30(18) . . ? 
C16 C17 N22 120.92(17) . . ? 
C19 C18 C17 121.3(2) . . ? 
C19 C18 H18A 119.3 . . ? 
C17 C18 H18A 119.3 . . ? 
C20 C19 C18 119.7(2) . . ? 
C20 C19 H19A 120.1 . . ? 
C18 C19 H19A 120.1 . . ? 
C19 C20 C21 119.8(2) . . ? 
C19 C20 H20A 120.1 . . ? 
C21 C20 H20A 120.1 . . ? 
C20 C21 C16 121.3(2) . . ? 
C20 C21 H21A 119.3 . . ? 
C16 C21 H21A 119.3 . . ? 
C17 N22 C24 110.90(16) . . ? 
C17 N22 C23 110.69(16) . . ? 
C24 N22 C23 109.38(17) . . ? 
C17 N22 Na 112.57(12) . . ? 
C24 N22 Na 113.77(13) . . ? 
C23 N22 Na 98.92(13) . . ? 
N22 C23 H23A 109.5 . . ? 
N22 C23 H23B 109.5 . . ? 
H23A C23 H23B 109.5 . . ? 
N22 C23 H23C 109.5 . . ? 
H23A C23 H23C 109.5 . . ? 
H23B C23 H23C 109.5 . . ? 
N22 C24 H24A 109.5 . . ? 
N22 C24 H24B 109.5 . . ? 
H24A C24 H24B 109.5 . . ? 
N22 C24 H24C 109.5 . . ? 
H24A C24 H24C 109.5 . . ? 
H24B C24 H24C 109.5 . . ? 
F6 P1 F2 90.60(19) . . ? 
F6 P1 F5 91.34(17) . . ? 
F2 P1 F5 90.94(19) . . ? 
F6 P1 F1 89.35(14) . . ? 
F2 P1 F1 89.43(17) . . ? 
F5 P1 F1 179.21(18) . . ? 
F6 P1 F3 89.62(15) . . ? 
F2 P1 F3 179.6(2) . . ? 
F5 P1 F3 89.36(16) . . ? 
F1 P1 F3 90.26(13) . . ? 
F6 P1 F4 178.3(2) . . ? 
F2 P1 F4 90.64(18) . . ? 
F5 P1 F4 89.87(16) . . ? 
F1 P1 F4 89.44(15) . . ? 
F3 P1 F4 89.13(15) . . ? 
F1A P1A F3A 179.5(5) . . ? 
F1A P1A F2A 90.2(4) . . ? 
F3A P1A F2A 89.8(4) . . ? 
F1A P1A F6A 89.8(4) . . ? 
F3A P1A F6A 89.7(3) . . ? 
F2A P1A F6A 90.7(4) . . ? 
F1A P1A F5A 90.4(4) . . ? 
F3A P1A F5A 89.6(3) . . ? 
F2A P1A F5A 178.5(5) . . ? 
F6A P1A F5A 90.6(3) . . ? 
F1A P1A F4A 90.8(4) . . ? 
F3A P1A F4A 89.8(4) . . ? 
F2A P1A F4A 90.1(4) . . ? 
F6A P1A F4A 179.0(5) . . ? 
F5A P1A F4A 88.6(4) . . ? 
 
loop_ 
 _geom_torsion_atom_site_label_1 
 _geom_torsion_atom_site_label_2 
 _geom_torsion_atom_site_label_3 
 _geom_torsion_atom_site_label_4 
 _geom_torsion 
 _geom_torsion_site_symmetry_1 
 _geom_torsion_site_symmetry_2 
 _geom_torsion_site_symmetry_3 
 _geom_torsion_site_symmetry_4 
 _geom_torsion_publ_flag 
O7 Na N1 C16 132.98(12) . . . . ? 
O10 Na N1 C16 -110.80(14) . . . . ? 
O13 Na N1 C16 -112.59(13) . . . . ? 
O4 Na N1 C16 90.86(13) . . . . ? 
N22 Na N1 C16 -6.54(12) . . . . ? 
O7 Na N1 C2 12.58(16) . . . . ? 
O10 Na N1 C2 128.79(14) . . . . ? 
O13 Na N1 C2 127.01(13) . . . . ? 
O4 Na N1 C2 -29.54(12) . . . . ? 
N22 Na N1 C2 -126.94(13) . . . . ? 
O7 Na N1 C15 -104.92(13) . . . . ? 
O10 Na N1 C15 11.30(18) . . . . ? 
O13 Na N1 C15 9.52(12) . . . . ? 
O4 Na N1 C15 -147.03(13) . . . . ? 
N22 Na N1 C15 115.57(13) . . . . ? 
C16 N1 C2 C3 -64.1(2) . . . . ? 
C15 N1 C2 C3 169.83(17) . . . . ? 
Na N1 C2 C3 56.80(18) . . . . ? 
N1 C2 C3 O4 -60.1(2) . . . . ? 
C2 C3 O4 C5 -97.4(2) . . . . ? 
C2 C3 O4 Na 27.5(2) . . . . ? 
O7 Na O4 C5 -19.05(14) . . . . ? 
O10 Na O4 C5 -31.34(19) . . . . ? 
O13 Na O4 C5 92.96(16) . . . . ? 
N1 Na O4 C5 128.99(15) . . . . ? 
N22 Na O4 C5 -159.95(15) . . . . ? 
O7 Na O4 C3 -146.44(14) . . . . ? 
O10 Na O4 C3 -158.74(13) . . . . ? 
O13 Na O4 C3 -34.43(17) . . . . ? 
N1 Na O4 C3 1.59(13) . . . . ? 
N22 Na O4 C3 72.65(14) . . . . ? 
C3 O4 C5 C6 174.54(18) . . . . ? 
Na O4 C5 C6 48.7(2) . . . . ? 
O4 C5 C6 O7 -63.3(2) . . . . ? 
C5 C6 O7 C8 170.42(18) . . . . ? 
C5 C6 O7 Na 45.4(2) . . . . ? 
O10 Na O7 C8 29.68(13) . . . . ? 
O13 Na O7 C8 81.58(14) . . . . ? 
O4 Na O7 C8 -141.85(14) . . . . ? 
N1 Na O7 C8 175.26(13) . . . . ? 
N22 Na O7 C8 -71.96(16) . . . . ? 
O10 Na O7 C6 156.94(15) . . . . ? 
O13 Na O7 C6 -151.16(14) . . . . ? 
O4 Na O7 C6 -14.60(14) . . . . ? 
N1 Na O7 C6 -57.49(17) . . . . ? 
N22 Na O7 C6 55.29(18) . . . . ? 
C6 O7 C8 C9 176.63(18) . . . . ? 
Na O7 C8 C9 -56.49(19) . . . . ? 
O7 C8 C9 O10 56.8(2) . . . . ? 
C8 C9 O10 C11 -164.93(18) . . . . ? 
C8 C9 O10 Na -29.6(2) . . . . ? 
O7 Na O10 C9 0.75(13) . . . . ? 
O13 Na O10 C9 -132.11(14) . . . . ? 
O4 Na O10 C9 13.10(18) . . . . ? 
N1 Na O10 C9 -133.93(14) . . . . ? 
N22 Na O10 C9 135.40(13) . . . . ? 
O7 Na O10 C11 135.07(15) . . . . ? 
O13 Na O10 C11 2.21(13) . . . . ? 
O4 Na O10 C11 147.42(14) . . . . ? 
N1 Na O10 C11 0.38(19) . . . . ? 
N22 Na O10 C11 -90.29(14) . . . . ? 
C9 O10 C11 C12 162.34(18) . . . . ? 
Na O10 C11 C12 26.9(2) . . . . ? 
O10 C11 C12 O13 -57.6(2) . . . . ? 
C11 C12 O13 C14 179.44(17) . . . . ? 
C11 C12 O13 Na 58.98(18) . . . . ? 
O7 Na O13 C12 -84.03(13) . . . . ? 
O10 Na O13 C12 -32.22(12) . . . . ? 
O4 Na O13 C12 -177.44(12) . . . . ? 
N1 Na O13 C12 146.66(13) . . . . ? 
N22 Na O13 C12 78.31(12) . . . . ? 
O7 Na O13 C14 152.43(12) . . . . ? 
O10 Na O13 C14 -155.75(13) . . . . ? 
O4 Na O13 C14 59.02(16) . . . . ? 
N1 Na O13 C14 23.12(12) . . . . ? 
N22 Na O13 C14 -45.23(13) . . . . ? 
C12 O13 C14 C15 -171.82(17) . . . . ? 
Na O13 C14 C15 -52.38(18) . . . . ? 
C16 N1 C15 C14 81.6(2) . . . . ? 
C2 N1 C15 C14 -152.19(17) . . . . ? 
Na N1 C15 C14 -41.12(18) . . . . ? 
O13 C14 C15 N1 65.6(2) . . . . ? 
C2 N1 C16 C21 -58.3(2) . . . . ? 
C15 N1 C16 C21 68.0(2) . . . . ? 
Na N1 C16 C21 -173.23(15) . . . . ? 
C2 N1 C16 C17 121.0(2) . . . . ? 
C15 N1 C16 C17 -112.7(2) . . . . ? 
Na N1 C16 C17 6.1(2) . . . . ? 
C21 C16 C17 C18 -0.2(3) . . . . ? 
N1 C16 C17 C18 -179.52(17) . . . . ? 
C21 C16 C17 N22 179.49(17) . . . . ? 
N1 C16 C17 N22 0.2(3) . . . . ? 
C16 C17 C18 C19 0.4(3) . . . . ? 
N22 C17 C18 C19 -179.36(18) . . . . ? 
C17 C18 C19 C20 0.0(3) . . . . ? 
C18 C19 C20 C21 -0.4(3) . . . . ? 
C19 C20 C21 C16 0.5(3) . . . . ? 
C17 C16 C21 C20 -0.2(3) . . . . ? 
N1 C16 C21 C20 179.08(18) . . . . ? 
C18 C17 N22 C24 -57.9(2) . . . . ? 
C16 C17 N22 C24 122.4(2) . . . . ? 
C18 C17 N22 C23 63.7(2) . . . . ? 
C16 C17 N22 C23 -116.0(2) . . . . ? 
C18 C17 N22 Na 173.39(15) . . . . ? 
C16 C17 N22 Na -6.3(2) . . . . ? 
O7 Na N22 C17 -127.34(13) . . . . ? 
O10 Na N22 C17 148.28(12) . . . . ? 
O13 Na N22 C17 75.97(13) . . . . ? 
O4 Na N22 C17 -65.01(13) . . . . ? 
N1 Na N22 C17 6.63(12) . . . . ? 
O7 Na N22 C24 105.42(15) . . . . ? 
O10 Na N22 C24 21.04(15) . . . . ? 
O13 Na N22 C24 -51.27(14) . . . . ? 
O4 Na N22 C24 167.76(14) . . . . ? 
N1 Na N22 C24 -120.60(15) . . . . ? 
O7 Na N22 C23 -10.44(16) . . . . ? 
O10 Na N22 C23 -94.82(13) . . . . ? 
O13 Na N22 C23 -167.13(12) . . . . ? 
O4 Na N22 C23 51.89(13) . . . . ? 
N1 Na N22 C23 123.54(13) . . . . ? 
 
_diffrn_measured_fraction_theta_max    0.995 
_diffrn_reflns_theta_full              27.49 
_diffrn_measured_fraction_theta_full   0.995 
_refine_diff_density_max    0.317 
_refine_diff_density_min   -0.332 
_refine_diff_density_rms    0.054
#===END

data_8�KPF6 
 
_audit_creation_method            SHELXL 
_chemical_name_systematic 
; 
 ? 
; 
_chemical_name_common             ? 
_chemical_formula_moiety          ? 
_chemical_formula_structural      ? 
_chemical_formula_analytical      ? 
_chemical_formula_sum             'C18 H30 F6 K N2 O4 P' 
_chemical_formula_weight          522.51 
_chemical_melting_point           ? 
_chemical_compound_source         ? 
 
loop_ 
 _atom_type_symbol 
 _atom_type_description 
 _atom_type_scat_dispersion_real 
 _atom_type_scat_dispersion_imag 
 _atom_type_scat_source 
 'C'  'C'   0.0033   0.0016 
 'International Tables Vol C Tables 4.2.6.8 and 6.1.1.4' 
 'H'  'H'   0.0000   0.0000 
 'International Tables Vol C Tables 4.2.6.8 and 6.1.1.4' 
 'N'  'N'   0.0061   0.0033 
 'International Tables Vol C Tables 4.2.6.8 and 6.1.1.4' 
 'O'  'O'   0.0106   0.0060 
 'International Tables Vol C Tables 4.2.6.8 and 6.1.1.4' 
 'F'  'F'   0.0171   0.0103 
 'International Tables Vol C Tables 4.2.6.8 and 6.1.1.4' 
 'P'  'P'   0.1023   0.0942 
 'International Tables Vol C Tables 4.2.6.8 and 6.1.1.4' 
 'K'  'K'   0.2009   0.2494 
 'International Tables Vol C Tables 4.2.6.8 and 6.1.1.4' 
 
_symmetry_cell_setting            ? 
_symmetry_space_group_name_H-M    ? 
 
loop_ 
 _symmetry_equiv_pos_as_xyz 
 'x, y, z' 
 '-x, -y, -z' 
 
_cell_length_a                    9.815(2) 
_cell_length_b                    11.750(2) 
_cell_length_c                    12.481(3) 
_cell_angle_alpha                 62.83(3) 
_cell_angle_beta                  80.69(3) 
_cell_angle_gamma                 65.93(3) 
_cell_volume                      1168.7(4) 
_cell_formula_units_Z             2 
_cell_measurement_temperature     293(2) 
_cell_measurement_reflns_used     ? 
_cell_measurement_theta_min       ? 
_cell_measurement_theta_max       ? 
 
_exptl_crystal_description        ? 
_exptl_crystal_colour             ? 
_exptl_crystal_size_max           ? 
_exptl_crystal_size_mid           ? 
_exptl_crystal_size_min           ? 
_exptl_crystal_density_meas       ? 
_exptl_crystal_density_diffrn     1.485 
_exptl_crystal_density_method     ? 
_exptl_crystal_F_000              544 
_exptl_absorpt_coefficient_mu     0.370 
_exptl_absorpt_correction_type    ? 
_exptl_absorpt_correction_T_min   ? 
_exptl_absorpt_correction_T_max   ? 
 
_exptl_special_details 
; 
 ? 
; 
 
_diffrn_ambient_temperature       293(2) 
_diffrn_radiation_wavelength      0.71073 
_diffrn_radiation_type            MoK\a 
_diffrn_radiation_source          'fine-focus sealed tube' 
_diffrn_radiation_monochromator   graphite 
_diffrn_measurement_device        ? 
_diffrn_measurement_method        ? 
_diffrn_standards_number          ? 
_diffrn_standards_interval_count  ? 
_diffrn_standards_interval_time   ? 
_diffrn_standards_decay_%         ? 
_diffrn_reflns_number             5020 
_diffrn_reflns_av_R_equivalents   0.0104 
_diffrn_reflns_av_sigmaI/netI     0.0177 
_diffrn_reflns_limit_h_min        -8 
_diffrn_reflns_limit_h_max        10 
_diffrn_reflns_limit_k_min        -7 
_diffrn_reflns_limit_k_max        13 
_diffrn_reflns_limit_l_min        -13 
_diffrn_reflns_limit_l_max        13 
_diffrn_reflns_theta_min          1.83 
_diffrn_reflns_theta_max          23.27 
_reflns_number_total              3322 
_reflns_number_observed           2906 
_reflns_observed_criterion        >2sigma(I) 
 
_computing_data_collection        ? 
_computing_cell_refinement        ? 
_computing_data_reduction         ? 
_computing_structure_solution     'SHELXS-86 (Sheldrick, 1990)' 
_computing_structure_refinement   'SHELXL-93 (Sheldrick, 1993)' 
_computing_molecular_graphics     ? 
_computing_publication_material   ? 
 
_refine_special_details 
; 
 Refinement on F^2^ for ALL reflections except for 2 with very negative F^2^ 
 or flagged by the user for potential systematic errors.  Weighted R-factors 
 wR and all goodnesses of fit S are based on F^2^, conventional R-factors R 
 are based on F, with F set to zero for negative F^2^. The observed criterion 
 of F^2^ > 2sigma(F^2^) is used only for calculating _R_factor_obs etc. and is 
 not relevant to the choice of reflections for refinement.  R-factors based 
 on F^2^ are statistically about twice as large as those based on F, and R- 
 factors based on ALL data will be even larger. 
; 
 
_refine_ls_structure_factor_coef  Fsqd  
_refine_ls_matrix_type            full 
_refine_ls_weighting_scheme 
 'calc w=1/[\s^2^(Fo^2^)+(0.0936P)^2^+1.6059P] where P=(Fo^2^+2Fc^2^)/3' 
_atom_sites_solution_primary      direct 
_atom_sites_solution_secondary    difmap 
_atom_sites_solution_hydrogens    geom 
_refine_ls_hydrogen_treatment     ? 
_refine_ls_extinction_method      none 
_refine_ls_extinction_coef        ? 
_refine_ls_number_reflns          3320 
_refine_ls_number_parameters      289 
_refine_ls_number_restraints      0 
_refine_ls_R_factor_all           0.0639 
_refine_ls_R_factor_obs           0.0579 
_refine_ls_wR_factor_all          0.1711 
_refine_ls_wR_factor_obs          0.1631 
_refine_ls_goodness_of_fit_all    1.023 
_refine_ls_goodness_of_fit_obs    1.056 
_refine_ls_restrained_S_all       1.030 
_refine_ls_restrained_S_obs       1.056 
_refine_ls_shift/esd_max          0.005 
_refine_ls_shift/esd_mean         0.001 
 
loop_ 
 _atom_site_label 
 _atom_site_type_symbol 
 _atom_site_fract_x 
 _atom_site_fract_y 
 _atom_site_fract_z 
 _atom_site_U_iso_or_equiv 
 _atom_site_thermal_displace_type 
 _atom_site_occupancy 
 _atom_site_calc_flag 
 _atom_site_refinement_flags 
 _atom_site_disorder_group 
K K 0.20904(8) 0.25226(8) 0.24879(7) 0.0468(3) Uani 1 d . . 
O4 O 0.2886(3) 0.0509(3) 0.4752(2) 0.0541(7) Uani 1 d . . 
O7 O -0.0171(3) 0.2308(3) 0.4207(2) 0.0547(7) Uani 1 d . . 
O10 O -0.0906(3) 0.3995(3) 0.1731(3) 0.0628(7) Uani 1 d . . 
O13 O 0.0843(3) 0.1637(3) 0.1310(3) 0.0643(8) Uani 1 d . . 
N1 N 0.3639(3) -0.0361(3) 0.2742(3) 0.0444(7) Uani 1 d . . 
N17 N 0.4579(3) 0.1812(3) 0.1071(2) 0.0435(7) Uani 1 d . . 
C2 C 0.3378(5) -0.1192(4) 0.4012(3) 0.0572(10) Uani 1 d . . 
H2A H 0.3902(5) -0.2156(4) 0.4204(3) 0.069 Uiso 1 d R . 
H2B H 0.2331(5) -0.1016(4) 0.4100(3) 0.069 Uiso 1 d R . 
C3 C 0.3848(4) -0.0844(4) 0.4865(3) 0.0579(10) Uani 1 d . . 
H3A H 0.3825(4) -0.1511(4) 0.5676(3) 0.070 Uiso 1 d R . 
H3B H 0.4856(4) -0.0892(4) 0.4705(3) 0.070 Uiso 1 d R . 
C5 C 0.1750(4) 0.0505(4) 0.5617(3) 0.0575(10) Uani 1 d . . 
H5A H 0.2183(4) 0.0161(4) 0.6395(3) 0.069 Uiso 1 d R . 
H5B H 0.1283(4) -0.0091(4) 0.5662(3) 0.069 Uiso 1 d R . 
C6 C 0.0625(5) 0.1947(4) 0.5241(3) 0.0577(10) Uani 1 d . . 
H6A H -0.0056(5) 0.1999(4) 0.5878(3) 0.069 Uiso 1 d R . 
H6B H 0.1113(5) 0.2572(4) 0.5065(3) 0.069 Uiso 1 d R . 
C8 C -0.1277(5) 0.3668(4) 0.3759(4) 0.0664(11) Uani 1 d . . 
H8A H -0.0836(5) 0.4330(4) 0.3571(4) 0.080 Uiso 1 d R . 
H8B H -0.2018(5) 0.3754(4) 0.4352(4) 0.080 Uiso 1 d R . 
C9 C -0.1982(5) 0.3943(5) 0.2652(4) 0.0736(13) Uani 1 d . . 
H9A H -0.2308(5) 0.3213(5) 0.2816(4) 0.088 Uiso 1 d R . 
H9B H -0.2835(5) 0.4800(5) 0.2391(4) 0.088 Uiso 1 d R . 
C11 C -0.1189(6) 0.3778(5) 0.0774(5) 0.0825(14) Uani 1 d . . 
H11A H -0.0673(6) 0.4191(5) 0.0077(5) 0.099 Uiso 1 d R . 
H11B H -0.2239(6) 0.4248(5) 0.0577(5) 0.099 Uiso 1 d R . 
C12 C -0.0740(5) 0.2333(5) 0.1046(5) 0.0832(15) Uani 1 d . . 
H12A H -0.1258(5) 0.1902(5) 0.1732(5) 0.100 Uiso 1 d R . 
H12B H -0.0981(5) 0.2259(5) 0.0371(5) 0.100 Uiso 1 d R . 
C14 C 0.1239(5) 0.0203(4) 0.1803(4) 0.0628(11) Uani 1 d . . 
H14A H 0.0830(5) -0.0016(4) 0.1306(4) 0.075 Uiso 1 d R . 
H14B H 0.0831(5) -0.0107(4) 0.2589(4) 0.075 Uiso 1 d R . 
C15 C 0.2890(4) -0.0525(4) 0.1914(4) 0.0546(9) Uani 1 d . . 
H15A H 0.3141(4) -0.1495(4) 0.2181(4) 0.066 Uiso 1 d R . 
H15B H 0.3281(4) -0.0178(4) 0.1125(4) 0.066 Uiso 1 d R . 
C16 C 0.5200(4) -0.0660(3) 0.2439(3) 0.0420(8) Uani 1 d . . 
C17 C 0.5631(4) 0.0401(3) 0.1575(3) 0.0406(8) Uani 1 d . . 
C171 C 0.5173(5) 0.2773(4) 0.1059(4) 0.0636(11) Uani 1 d . . 
H17A H 0.6067(5) 0.2705(4) 0.0604(4) 0.095 Uiso 1 d R . 
H17B H 0.4443(5) 0.3699(4) 0.0692(4) 0.095 Uiso 1 d R . 
H17C H 0.5396(5) 0.2550(4) 0.1869(4) 0.095 Uiso 1 d R . 
C172 C 0.4022(5) 0.2286(4) -0.0140(4) 0.0646(11) Uani 1 d . . 
H17D H 0.4841(5) 0.2060(4) -0.0640(4) 0.097 Uiso 1 d R . 
H17E H 0.3369(5) 0.1837(4) -0.0082(4) 0.097 Uiso 1 d R . 
H17F H 0.3481(5) 0.3270(4) -0.0486(4) 0.097 Uiso 1 d R . 
C18 C 0.7115(4) 0.0073(4) 0.1219(3) 0.0502(9) Uani 1 d . . 
H18A H 0.7411(4) 0.0796(4) 0.0612(3) 0.060 Uiso 1 d R . 
C19 C 0.8161(4) -0.1259(4) 0.1726(4) 0.0599(11) Uani 1 d . . 
H19A H 0.9171(4) -0.1465(4) 0.1461(4) 0.072 Uiso 1 d R . 
C20 C 0.7740(5) -0.2285(4) 0.2605(4) 0.0655(11) Uani 1 d . . 
H20A H 0.8465(5) -0.3213(4) 0.2978(4) 0.079 Uiso 1 d R . 
C21 C 0.6280(5) -0.1994(4) 0.2945(4) 0.0589(10) Uani 1 d . . 
H21A H 0.6000(5) -0.2718(4) 0.3569(4) 0.071 Uiso 1 d R . 
P P 0.27757(12) 0.52791(11) 0.29236(10) 0.0583(3) Uani 1 d . . 
F1 F 0.3514(5) 0.3674(3) 0.3492(4) 0.148(2) Uani 1 d . . 
F2 F 0.1818(6) 0.5131(4) 0.2145(5) 0.164(2) Uani 1 d . . 
F3 F 0.1931(5) 0.6860(4) 0.2320(6) 0.183(3) Uani 1 d . . 
F4 F 0.3700(6) 0.5416(6) 0.3684(6) 0.199(3) Uani 1 d . . 
F5 F 0.3934(7) 0.5368(7) 0.1985(6) 0.204(3) Uani 1 d . . 
F6 F 0.1561(7) 0.5186(7) 0.3856(6) 0.212(3) Uani 1 d . . 
 
loop_ 
 _atom_site_aniso_label 
 _atom_site_aniso_U_11 
 _atom_site_aniso_U_22 
 _atom_site_aniso_U_33 
 _atom_site_aniso_U_23 
 _atom_site_aniso_U_13 
 _atom_site_aniso_U_12 
K 0.0448(5) 0.0442(5) 0.0496(5) -0.0196(4) 0.0039(3) -0.0171(4) 
O4 0.0539(15) 0.053(2) 0.0457(14) -0.0176(12) 0.0034(11) -0.0172(12) 
O7 0.055(2) 0.0461(14) 0.055(2) -0.0212(12) 0.0009(12) -0.0122(12) 
O10 0.055(2) 0.060(2) 0.065(2) -0.0246(14) -0.0064(13) -0.0143(13) 
O13 0.049(2) 0.067(2) 0.081(2) -0.038(2) -0.0123(14) -0.0131(13) 
N1 0.048(2) 0.040(2) 0.048(2) -0.0190(13) 0.0045(13) -0.0202(13) 
N17 0.042(2) 0.038(2) 0.046(2) -0.0161(13) 0.0030(12) -0.0141(13) 
C2 0.062(2) 0.044(2) 0.057(2) -0.015(2) 0.008(2) -0.023(2) 
C3 0.053(2) 0.056(2) 0.045(2) -0.013(2) -0.005(2) -0.011(2) 
C5 0.063(2) 0.062(2) 0.038(2) -0.018(2) 0.003(2) -0.020(2) 
C6 0.064(2) 0.062(2) 0.048(2) -0.028(2) 0.009(2) -0.022(2) 
C8 0.062(3) 0.050(2) 0.068(3) -0.024(2) 0.011(2) -0.008(2) 
C9 0.047(2) 0.058(3) 0.084(3) -0.015(2) -0.002(2) -0.007(2) 
C11 0.069(3) 0.071(3) 0.087(3) -0.024(3) -0.032(3) -0.007(2) 
C12 0.062(3) 0.086(3) 0.103(4) -0.044(3) -0.027(3) -0.015(2) 
C14 0.056(2) 0.071(3) 0.072(3) -0.033(2) 0.003(2) -0.031(2) 
C15 0.056(2) 0.051(2) 0.070(3) -0.033(2) 0.001(2) -0.024(2) 
C16 0.043(2) 0.039(2) 0.045(2) -0.021(2) -0.0022(15) -0.0122(15) 
C17 0.040(2) 0.041(2) 0.043(2) -0.023(2) -0.0025(14) -0.0116(15) 
C171 0.071(3) 0.047(2) 0.075(3) -0.030(2) 0.001(2) -0.020(2) 
C172 0.070(3) 0.051(2) 0.061(2) -0.016(2) -0.015(2) -0.015(2) 
C18 0.045(2) 0.057(2) 0.057(2) -0.032(2) 0.006(2) -0.020(2) 
C19 0.038(2) 0.071(3) 0.079(3) -0.049(2) -0.002(2) -0.008(2) 
C20 0.054(2) 0.050(2) 0.083(3) -0.034(2) -0.013(2) 0.000(2) 
C21 0.063(3) 0.039(2) 0.064(2) -0.018(2) -0.004(2) -0.012(2) 
P 0.0594(7) 0.0485(6) 0.0711(7) -0.0312(5) 0.0008(5) -0.0179(5) 
F1 0.168(4) 0.058(2) 0.166(4) -0.020(2) -0.067(3) -0.002(2) 
F2 0.218(5) 0.098(3) 0.197(4) -0.044(3) -0.109(4) -0.058(3) 
F3 0.144(4) 0.058(2) 0.339(7) -0.071(3) -0.092(4) -0.010(2) 
F4 0.182(5) 0.217(5) 0.254(6) -0.143(5) -0.093(4) -0.042(4) 
F5 0.220(6) 0.235(6) 0.201(5) -0.117(5) 0.134(5) -0.148(5) 
F6 0.215(6) 0.256(7) 0.237(6) -0.166(6) 0.142(5) -0.137(5) 
 
_geom_special_details 
; 
 All esds (except the esd in the dihedral angle between two l.s. planes) 
 are estimated using the full covariance matrix.  The cell esds are taken 
 into account individually in the estimation of esds in distances, angles 
 and torsion angles; correlations between esds in cell parameters are only 
 used when they are defined by crystal symmetry.  An approximate (isotropic) 
 treatment of cell esds is used for estimating esds involving l.s. planes. 
; 
 
loop_ 
 _geom_bond_atom_site_label_1 
 _geom_bond_atom_site_label_2 
 _geom_bond_distance 
 _geom_bond_site_symmetry_2 
 _geom_bond_publ_flag 
K O4 2.701(3) . ? 
K O13 2.786(3) . ? 
K O10 2.791(3) . ? 
K F2 2.796(4) . ? 
K O7 2.831(3) . ? 
K N17 2.842(3) . ? 
K N1 2.978(3) . ? 
K F1 3.001(5) . ? 
K C171 3.305(5) . ? 
K C6 3.377(4) . ? 
K C8 3.446(4) . ? 
K P 3.8396(15) . ? 
O4 C5 1.420(4) . ? 
O4 C3 1.433(5) . ? 
O7 C8 1.418(5) . ? 
O7 C6 1.418(5) . ? 
O10 C11 1.419(6) . ? 
O10 C9 1.427(5) . ? 
O13 C14 1.403(5) . ? 
O13 C12 1.440(5) . ? 
N1 C16 1.452(4) . ? 
N1 C15 1.479(5) . ? 
N1 C2 1.480(5) . ? 
N17 C17 1.440(4) . ? 
N17 C171 1.460(5) . ? 
N17 C172 1.464(5) . ? 
C2 C3 1.493(6) . ? 
C5 C6 1.492(5) . ? 
C8 C9 1.488(7) . ? 
C11 C12 1.450(7) . ? 
C14 C15 1.487(6) . ? 
C16 C21 1.391(5) . ? 
C16 C17 1.397(5) . ? 
C17 C18 1.399(5) . ? 
C18 C19 1.378(5) . ? 
C19 C20 1.371(6) . ? 
C20 C21 1.373(6) . ? 
P F5 1.494(4) . ? 
P F4 1.512(4) . ? 
P F6 1.526(5) . ? 
P F3 1.541(4) . ? 
P F1 1.554(3) . ? 
P F2 1.563(4) . ? 
 
loop_ 
 _geom_angle_atom_site_label_1 
 _geom_angle_atom_site_label_2 
 _geom_angle_atom_site_label_3 
 _geom_angle 
 _geom_angle_site_symmetry_1 
 _geom_angle_site_symmetry_3 
 _geom_angle_publ_flag 
O4 K O13 107.80(9) . . ? 
O4 K O10 120.99(9) . . ? 
O13 K O10 61.18(8) . . ? 
O4 K F2 115.02(11) . . ? 
O13 K F2 133.42(10) . . ? 
O10 K F2 81.07(12) . . ? 
O4 K O7 61.91(8) . . ? 
O13 K O7 88.94(9) . . ? 
O10 K O7 60.23(8) . . ? 
F2 K O7 95.31(14) . . ? 
O4 K N17 105.19(9) . . ? 
O13 K N17 82.54(9) . . ? 
O10 K N17 127.25(9) . . ? 
F2 K N17 102.45(15) . . ? 
O7 K N17 161.54(8) . . ? 
O4 K N1 63.62(9) . . ? 
O13 K N1 61.61(9) . . ? 
O10 K N1 120.09(9) . . ? 
F2 K N1 157.11(13) . . ? 
O7 K N1 102.82(8) . . ? 
N17 K N1 58.72(8) . . ? 
O4 K F1 77.86(10) . . ? 
O13 K F1 173.79(11) . . ? 
O10 K F1 118.47(10) . . ? 
F2 K F1 42.65(10) . . ? 
O7 K F1 96.12(12) . . ? 
N17 K F1 93.59(12) . . ? 
N1 K F1 120.36(9) . . ? 
O4 K C171 107.84(10) . . ? 
O13 K C171 105.99(10) . . ? 
O10 K C171 131.17(10) . . ? 
F2 K C171 78.00(15) . . ? 
O7 K C171 164.35(10) . . ? 
N17 K C171 26.12(9) . . ? 
N1 K C171 80.90(9) . . ? 
F1 K C171 69.31(13) . . ? 
O4 K C6 44.09(9) . . ? 
O13 K C6 109.60(10) . . ? 
O10 K C6 82.67(10) . . ? 
F2 K C6 89.95(15) . . ? 
O7 K C6 24.44(9) . . ? 
N17 K C6 148.73(10) . . ? 
N1 K C6 100.78(10) . . ? 
F1 K C6 76.17(13) . . ? 
C171 K C6 140.22(11) . . ? 
O4 K C8 83.54(10) . . ? 
O13 K C8 90.85(11) . . ? 
O10 K C8 43.07(10) . . ? 
F2 K C8 77.0(2) . . ? 
O7 K C8 23.60(9) . . ? 
N17 K C8 170.31(10) . . ? 
N1 K C8 123.88(10) . . ? 
F1 K C8 92.36(13) . . ? 
C171 K C8 154.98(11) . . ? 
C6 K C8 40.63(10) . . ? 
O4 K P 96.92(7) . . ? 
O13 K P 153.77(7) . . ? 
O10 K P 98.74(7) . . ? 
F2 K P 20.45(8) . . ? 
O7 K P 95.25(6) . . ? 
N17 K P 99.62(7) . . ? 
N1 K P 141.16(6) . . ? 
F1 K P 22.23(6) . . ? 
C171 K P 73.50(8) . . ? 
C6 K P 82.08(8) . . ? 
C8 K P 83.20(9) . . ? 
C5 O4 C3 113.6(3) . . ? 
C5 O4 K 116.6(2) . . ? 
C3 O4 K 116.5(2) . . ? 
C8 O7 C6 113.3(3) . . ? 
C8 O7 K 103.3(2) . . ? 
C6 O7 K 99.9(2) . . ? 
C11 O10 C9 116.3(4) . . ? 
C11 O10 K 110.6(2) . . ? 
C9 O10 K 116.8(2) . . ? 
C14 O13 C12 109.6(3) . . ? 
C14 O13 K 115.4(2) . . ? 
C12 O13 K 117.1(3) . . ? 
C16 N1 C15 108.9(3) . . ? 
C16 N1 C2 114.8(3) . . ? 
C15 N1 C2 110.6(3) . . ? 
C16 N1 K 111.5(2) . . ? 
C15 N1 K 108.3(2) . . ? 
C2 N1 K 102.5(2) . . ? 
C17 N17 C171 112.5(3) . . ? 
C17 N17 C172 113.4(3) . . ? 
C171 N17 C172 109.4(3) . . ? 
C17 N17 K 116.8(2) . . ? 
C171 N17 K 94.9(2) . . ? 
C172 N17 K 108.2(2) . . ? 
N1 C2 C3 112.3(3) . . ? 
O4 C3 C2 111.4(3) . . ? 
O4 C5 C6 108.6(3) . . ? 
O7 C6 C5 108.1(3) . . ? 
O7 C6 K 55.7(2) . . ? 
C5 C6 K 85.0(2) . . ? 
O7 C8 C9 108.2(4) . . ? 
O7 C8 K 53.1(2) . . ? 
C9 C8 K 86.2(2) . . ? 
O10 C9 C8 108.8(4) . . ? 
O10 C11 C12 114.0(4) . . ? 
O13 C12 C11 109.3(4) . . ? 
O13 C14 C15 110.5(3) . . ? 
N1 C15 C14 115.2(3) . . ? 
C21 C16 C17 118.5(3) . . ? 
C21 C16 N1 121.8(3) . . ? 
C17 C16 N1 119.6(3) . . ? 
C16 C17 C18 118.8(3) . . ? 
C16 C17 N17 120.9(3) . . ? 
C18 C17 N17 120.3(3) . . ? 
N17 C171 K 59.0(2) . . ? 
C19 C18 C17 121.5(4) . . ? 
C20 C19 C18 119.2(4) . . ? 
C19 C20 C21 120.2(4) . . ? 
C20 C21 C16 121.6(4) . . ? 
F5 P F4 89.7(4) . . ? 
F5 P F6 178.1(4) . . ? 
F4 P F6 92.2(4) . . ? 
F5 P F3 91.3(4) . . ? 
F4 P F3 90.5(3) . . ? 
F6 P F3 88.6(4) . . ? 
F5 P F1 90.3(3) . . ? 
F4 P F1 94.2(3) . . ? 
F6 P F1 89.6(3) . . ? 
F3 P F1 175.0(2) . . ? 
F5 P F2 90.6(4) . . ? 
F4 P F2 179.7(3) . . ? 
F6 P F2 87.5(4) . . ? 
F3 P F2 89.7(2) . . ? 
F1 P F2 85.5(2) . . ? 
F5 P K 92.6(2) . . ? 
F4 P K 141.1(2) . . ? 
F6 P K 85.9(2) . . ? 
F3 P K 128.2(2) . . ? 
F1 P K 46.9(2) . . ? 
F2 P K 38.69(15) . . ? 
P F1 K 110.8(2) . . ? 
P F2 K 120.9(2) . . ? 
 
_refine_diff_density_max    0.553 
_refine_diff_density_min   -0.426 
_refine_diff_density_rms    0.058 
#===END

data_9�LiBF4 
 
_audit_creation_method            SHELXL-97 
_chemical_name_systematic 
; 
 ? 
; 
_chemical_name_common             ? 
_chemical_melting_point           ? 
_chemical_formula_moiety          ? 
_chemical_formula_sum 
 'C20 H38 B F4 Li N2 O7' 
_chemical_formula_weight          512.27 
 
loop_ 
 _atom_type_symbol 
 _atom_type_description 
 _atom_type_scat_dispersion_real 
 _atom_type_scat_dispersion_imag 
 _atom_type_scat_source 
 'C'  'C'   0.0033   0.0016 
 'International Tables Vol C Tables 4.2.6.8 and 6.1.1.4' 
 'H'  'H'   0.0000   0.0000 
 'International Tables Vol C Tables 4.2.6.8 and 6.1.1.4' 
 'N'  'N'   0.0061   0.0033 
 'International Tables Vol C Tables 4.2.6.8 and 6.1.1.4' 
 'B'  'B'   0.0013   0.0007 
 'International Tables Vol C Tables 4.2.6.8 and 6.1.1.4' 
 'Li'  'Li'  -0.0003   0.0001 
 'International Tables Vol C Tables 4.2.6.8 and 6.1.1.4' 
 'O'  'O'   0.0106   0.0060 
 'International Tables Vol C Tables 4.2.6.8 and 6.1.1.4' 
 'F'  'F'   0.0171   0.0103 
 'International Tables Vol C Tables 4.2.6.8 and 6.1.1.4' 
 
_symmetry_cell_setting            Monoclinic 
_symmetry_space_group_name_H-M    P21/n
 
loop_ 
 _symmetry_equiv_pos_as_xyz 
 'x, y, z' 
 '-x+1/2, y+1/2, -z+1/2' 
 '-x, -y, -z' 
 'x-1/2, -y-1/2, z-1/2' 
 
_cell_length_a                    11.3765(3) 
_cell_length_b                    12.1450(3) 
_cell_length_c                    18.5284(4) 
_cell_angle_alpha                 90.00 
_cell_angle_beta                  95.049(1) 
_cell_angle_gamma                 90.00 
_cell_volume                      2550.09(11) 
_cell_formula_units_Z             4 
_cell_measurement_temperature     153(2) 
_cell_measurement_reflns_used     ? 
_cell_measurement_theta_min       ? 
_cell_measurement_theta_max       ? 
 
_exptl_crystal_description        prisms 
_exptl_crystal_colour             colorless 
_exptl_crystal_size_max           0.45 
_exptl_crystal_size_mid           0.30 
_exptl_crystal_size_min           0.20 
_exptl_crystal_density_meas       ? 
_exptl_crystal_density_diffrn     1.334 
_exptl_crystal_density_method     'not measured' 
_exptl_crystal_F_000              1088 
_exptl_absorpt_coefficient_mu     0.115 
_exptl_absorpt_correction_type    none 
_exptl_absorpt_correction_T_min   ? 
_exptl_absorpt_correction_T_max   ? 
_exptl_absorpt_process_details    ? 
 
_exptl_special_details 
; 
 ? 
; 
 
_diffrn_ambient_temperature       153(2) 
_diffrn_radiation_wavelength      0.71073 
_diffrn_radiation_type            MoK\a 
_diffrn_radiation_source          'fine-focus sealed tube' 
_diffrn_radiation_monochromator   graphite 
_diffrn_measurement_device_type   'Nonius Kappa CCD' 
_diffrn_measurement_method        \w-scans
_diffrn_detector_area_resol_mean  ? 
_diffrn_standards_number          ? 
_diffrn_standards_interval_count  ? 
_diffrn_standards_interval_time   ? 
_diffrn_standards_decay_%         ? 
_diffrn_reflns_number             10038 
_diffrn_reflns_av_R_equivalents   0.0289 
_diffrn_reflns_av_sigmaI/netI     0.0517 
_diffrn_reflns_limit_h_min        -14 
_diffrn_reflns_limit_h_max        14 
_diffrn_reflns_limit_k_min        -15 
_diffrn_reflns_limit_k_max        15 
_diffrn_reflns_limit_l_min        -24 
_diffrn_reflns_limit_l_max        24 
_diffrn_reflns_theta_min          3.20 
_diffrn_reflns_theta_max          27.50 
_reflns_number_total              5851 
_reflns_number_gt                 3625 
_reflns_threshold_expression      >2sigma(I) 
_publ_section_references
;
Altomare A., Burla M.C., Camalli M., Cascarano G.L., Giacovazzo C., 
Guagliardi A., Moliterni A.G.G., Polidori G.,Spagna R. Sir97.  
(1999) J. Appl. Cryst. 32, 115-119.

Otwinowski, Z. and Minor, W.  (1997).  Methods in Enzymology,
276, Macromolecular Crystallography, part A, 307-326, C. W. Carter,
Jr. and R. M. Sweets, Eds., Academic Press.

Sheldrick, G. M.  (1998).  SHELXTL/PC.  Release 5.10.  Siemens 
Analytical X-ray Instruments, Inc., Madison, WI, USA.


;
_computing_data_collection        'Collect software, Nonius B.V. 1998'
_computing_cell_refinement        'Collect software, Nonius B.V. 1998'
_computing_data_reduction         
;
DENZO and Scalepack (Otwinoski and Minor, 1997)
;
_computing_structure_solution     
;

SIR97 - Altomare A., Burla M.C., Camalli M., Cascarano G.L., Giacovazzo C., 
Guagliardi A., Moliterni A.G.G., Polidori G.,Spagna R.
;
_computing_structure_refinement   'XL SHELXTL/PC, Siemens Analytical'
_computing_molecular_graphics     'XP SHELXTL/PC, Siemens Analytical' 
_computing_publication_material   ? 

 
_refine_special_details 
; 
 Refinement of F^2^ against ALL reflections.  The weighted R-factor wR and 
 goodness of fit S are based on F^2^, conventional R-factors R are based 
 on F, with F set to zero for negative F^2^. The threshold expression of 
 F^2^ > 2sigma(F^2^) is used only for calculating R-factors(gt) etc. and is 
 not relevant to the choice of reflections for refinement.  R-factors based 
 on F^2^ are statistically about twice as large as those based on F, and R- 
 factors based on ALL data will be even larger. 

A portion of the crown was disordered into two different conformations.  The 
disorder involved two CH2-CH2-O moities adjacent to the nitrogen 
atom of the crown.  The atoms affected are labeled O13, C14, C15, O16, C17 and 
C18 for the major component and O13a, C14a, C15a, O16a, C17a and C18a for the 
minor component.  The geometry of the two components was restrained throughout 
the refinement.  The non-H atoms of these two groups were refined anisotropically 
while being restrained to be approximately isotropic.  The site occupancy 
factors for the two groups were refined while refining a common isotropic 
displacement parameter for all atoms in the disordered region.  The site 
occupancy factor of one group was set to a variable, x, while the other group 
had a site occupancy factor of 1-x.  In this way, the site occupancy factor of 
the major component was estimated to be 55(2)%.
; 
 
_refine_ls_structure_factor_coef  Fsqd  
_refine_ls_matrix_type            full 
_refine_ls_weighting_scheme       calc  
_refine_ls_weighting_details 
 'calc w=1/[\s^2^(Fo^2^)+(0.0374P)^2^+2.3161P] where P=(Fo^2^+2Fc^2^)/3' 
_atom_sites_solution_primary      direct 
_atom_sites_solution_secondary    difmap 
_atom_sites_solution_hydrogens    geom 
_refine_ls_hydrogen_treatment     mixed 
_refine_ls_extinction_method      SHELXL 
_refine_ls_extinction_coef        0.0048(7) 
_refine_ls_extinction_expression 
 'Fc^*^=kFc[1+0.001xFc^2^\l^3^/sin(2\q)]^-1/4^' 
_refine_ls_number_reflns          5851 
_refine_ls_number_parameters      387 
_refine_ls_number_restraints      101 
_refine_ls_R_factor_all           0.1091 
_refine_ls_R_factor_gt            0.0582 
_refine_ls_wR_factor_ref          0.1443 
_refine_ls_wR_factor_gt           0.1259 
_refine_ls_goodness_of_fit_ref    1.051 
_refine_ls_restrained_S_all       1.096 
_refine_ls_shift/su_max           0.002 
_refine_ls_shift/su_mean          0.000 
 
loop_ 
 _atom_site_label 
 _atom_site_type_symbol 
 _atom_site_fract_x 
 _atom_site_fract_y 
 _atom_site_fract_z 
 _atom_site_U_iso_or_equiv 
 _atom_site_adp_type 
 _atom_site_occupancy 
 _atom_site_symmetry_multiplicity 
 _atom_site_calc_flag 
 _atom_site_refinement_flags 
 _atom_site_disorder_assembly 
 _atom_site_disorder_group 
N1 N 0.30655(18) 0.72670(17) 0.55441(11) 0.0363(5) Uani 1 1 d . . . 
O1W O 0.24494(17) 0.51617(15) 0.71982(9) 0.0444(5) Uani 1 1 d . . . 
H1WA H 0.2552 0.4403 0.7239 0.053 Uiso 1 1 d R A . 
H1WB H 0.2304 0.5377 0.7642 0.053 Uiso 1 1 d R . . 
Li1 Li 0.2746(4) 0.6143(4) 0.6426(2) 0.0371(10) Uani 1 1 d . A . 
C2 C 0.2114(3) 0.8078(2) 0.55887(16) 0.0493(8) Uani 1 1 d . . . 
H2A H 0.2085 0.8568 0.5160 0.059 Uiso 1 1 d R . . 
H2B H 0.2283 0.8538 0.6027 0.059 Uiso 1 1 d R . . 
C3 C 0.0947(2) 0.7524(2) 0.56182(14) 0.0454(7) Uani 1 1 d . . . 
H3A H 0.0334 0.8074 0.5705 0.055 Uiso 1 1 d R A . 
H3B H 0.0717 0.7147 0.5153 0.055 Uiso 1 1 d R . . 
O4 O 0.10639(14) 0.67423(14) 0.62014(9) 0.0365(4) Uani 1 1 d . A . 
C5 C -0.0030(2) 0.6293(3) 0.63861(15) 0.0448(7) Uani 1 1 d . . . 
H5A H 0.0100 0.5562 0.6573 0.054 Uiso 1 1 d R A . 
H5B H -0.0560 0.6246 0.5955 0.054 Uiso 1 1 d R . . 
C6 C -0.0566(2) 0.6975(3) 0.69444(15) 0.0463(7) Uani 1 1 d . . . 
H6A H -0.1346 0.6711 0.7007 0.056 Uiso 1 1 d R . . 
H6B H -0.0630 0.7722 0.6776 0.056 Uiso 1 1 d R . . 
O7 O 0.01152(16) 0.69512(14) 0.76295(9) 0.0402(5) Uani 1 1 d . . . 
C8 C -0.0105(3) 0.6013(2) 0.80639(15) 0.0449(7) Uani 1 1 d . . . 
H8A H 0.0033 0.5348 0.7804 0.054 Uiso 1 1 d R . . 
H8B H -0.0911 0.6017 0.8180 0.054 Uiso 1 1 d R . . 
C9 C 0.0701(3) 0.6062(2) 0.87355(14) 0.0458(7) Uani 1 1 d . . . 
H9A H 0.0488 0.5517 0.9076 0.055 Uiso 1 1 d R A . 
H9B H 0.0652 0.6775 0.8955 0.055 Uiso 1 1 d R . . 
O10 O 0.18792(17) 0.58783(15) 0.85510(9) 0.0419(5) Uani 1 1 d . . . 
C11 C 0.2753(3) 0.6047(2) 0.91348(14) 0.0483(7) Uani 1 1 d D . . 
H11A H 0.2646 0.5515 0.9528 0.058 Uiso 1 1 d R A . 
H11B H 0.2677 0.6800 0.9331 0.058 Uiso 1 1 d R . . 
C12 C 0.3925(3) 0.5908(3) 0.88731(18) 0.0590(9) Uani 1 1 d D A . 
C19 C 0.2973(2) 0.6674(2) 0.48627(13) 0.0335(6) Uani 1 1 d . . . 
C20 C 0.2875(2) 0.5535(2) 0.48660(12) 0.0293(5) Uani 1 1 d . . . 
C21 C 0.2829(2) 0.4961(2) 0.42102(13) 0.0343(6) Uani 1 1 d . . . 
H21A H 0.2791 0.4172 0.4214 0.041 Uiso 1 1 d R . . 
C22 C 0.2850(2) 0.5520(2) 0.35622(13) 0.0391(6) Uani 1 1 d . . . 
H22A H 0.2795 0.5120 0.3114 0.047 Uiso 1 1 d R A . 
C23 C 0.2943(2) 0.6654(2) 0.35592(14) 0.0437(7) Uani 1 1 d . . . 
H23A H 0.2962 0.7043 0.3110 0.052 Uiso 1 1 d R . . 
C24 C 0.3001(2) 0.7228(2) 0.42036(14) 0.0425(7) Uani 1 1 d . . . 
H24A H 0.3073 0.8015 0.4201 0.051 Uiso 1 1 d R A . 
N25 N 0.28376(16) 0.49686(16) 0.55521(10) 0.0291(4) Uani 1 1 d . A . 
C26 C 0.1813(2) 0.4225(2) 0.55381(14) 0.0396(6) Uani 1 1 d . . . 
H26C H 0.1105 0.4656 0.5537 0.059 Uiso 1 1 d R A . 
H26A H 0.1876 0.3757 0.5957 0.059 Uiso 1 1 d R . . 
H26B H 0.1769 0.3772 0.5112 0.059 Uiso 1 1 d R . . 
C27 C 0.3938(2) 0.4345(2) 0.57409(15) 0.0459(7) Uani 1 1 d . . . 
H27A H 0.4032 0.3804 0.5373 0.069 Uiso 1 1 d R A . 
H27B H 0.4589 0.4850 0.5763 0.069 Uiso 1 1 d R . . 
H27C H 0.3915 0.3985 0.6201 0.069 Uiso 1 1 d R . . 
F1 F 0.66788(15) 0.97933(15) 0.56979(9) 0.0576(5) Uani 1 1 d . . . 
F2 F 0.86219(15) 0.94304(17) 0.58710(10) 0.0695(6) Uani 1 1 d . . . 
F3 F 0.73266(17) 0.80391(14) 0.58343(10) 0.0636(5) Uani 1 1 d . . . 
F4 F 0.74470(18) 0.91847(17) 0.67912(8) 0.0710(6) Uani 1 1 d . . . 
B1 B 0.7523(3) 0.9120(3) 0.60554(17) 0.0429(8) Uani 1 1 d . . . 
O13 O 0.4082(5) 0.6940(4) 0.8454(3) 0.0450(14) Uani 0.55 1 d PDU A 1 
C14 C 0.5161(4) 0.6969(5) 0.8139(3) 0.0530(15) Uani 0.55 1 d PDU A 1 
H14A H 0.5778 0.6724 0.8490 0.064 Uiso 0.55 1 d PR A 1 
H14B H 0.5324 0.7719 0.8019 0.064 Uiso 0.55 1 d PR A 1 
C15 C 0.5178(5) 0.6295(6) 0.7466(3) 0.0521(16) Uani 0.55 1 d PDU A 1 
H15A H 0.4965 0.5554 0.7577 0.062 Uiso 0.55 1 d PR A 1 
H15B H 0.5963 0.6282 0.7313 0.062 Uiso 0.55 1 d PR A 1 
O16 O 0.4368(5) 0.6657(5) 0.6889(3) 0.0432(14) Uani 0.55 1 d PDU A 1 
C17 C 0.4633(8) 0.7707(8) 0.6593(4) 0.047(2) Uani 0.55 1 d PDU A 1 
H17A H 0.5438 0.7930 0.6706 0.056 Uiso 0.55 1 d PR A 1 
H17B H 0.4117 0.8268 0.6748 0.056 Uiso 0.55 1 d PR A 1 
C18 C 0.4358(11) 0.7666(9) 0.5789(4) 0.046(3) Uani 0.55 1 d PDU A 1 
H18A H 0.4516 0.8306 0.5509 0.055 Uiso 0.55 1 d PR A 1 
H18B H 0.4871 0.7086 0.5656 0.055 Uiso 0.55 1 d PR A 1 
O13A O 0.4187(6) 0.6543(5) 0.8284(3) 0.0441(16) Uani 0.45 1 d PDU A 2 
C14A C 0.5199(6) 0.6247(7) 0.7909(4) 0.0516(19) Uani 0.45 1 d PDU A 2 
H14C H 0.5062 0.5553 0.7667 0.062 Uiso 0.45 1 d PR A 2 
H14D H 0.5871 0.6169 0.8257 0.062 Uiso 0.45 1 d PR A 2 
C15A C 0.5404(5) 0.7115(6) 0.7354(3) 0.0521(17) Uani 0.45 1 d PDU A 2 
H15C H 0.6165 0.6991 0.7183 0.063 Uiso 0.45 1 d PR A 2 
H15D H 0.5416 0.7824 0.7583 0.063 Uiso 0.45 1 d PR A 2 
O16A O 0.4516(6) 0.7075(5) 0.6761(3) 0.0351(16) Uani 0.45 1 d PDU A 2 
C17A C 0.4497(11) 0.8090(7) 0.6368(5) 0.037(2) Uani 0.45 1 d PDU A 2 
H17C H 0.5178 0.8552 0.6463 0.045 Uiso 0.45 1 d PR A 2 
H17D H 0.3832 0.8454 0.6546 0.045 Uiso 0.45 1 d PR A 2 
C18A C 0.4143(12) 0.7864(11) 0.5587(5) 0.034(2) Uani 0.45 1 d PDU A 2 
H18C H 0.4036 0.8545 0.5326 0.040 Uiso 0.45 1 d PR A 2 
H18D H 0.4783 0.7465 0.5405 0.040 Uiso 0.45 1 d PR A 2 
O2W O 0.2330(3) 0.79790(18) 0.76006(12) 0.0501(6) Uani 1 1 d . . . 
H2WA H 0.177(4) 0.764(4) 0.757(2) 0.109(19) Uiso 1 1 d . . . 
H2WB H 0.284(4) 0.757(4) 0.782(3) 0.111(18) Uiso 1 1 d . . . 
H12A H 0.454(3) 0.590(2) 0.9267(17) 0.053(8) Uiso 1 1 d . . . 
H12B H 0.400(3) 0.518(3) 0.8631(18) 0.070(11) Uiso 1 1 d . . . 
 
loop_ 
 _atom_site_aniso_label 
 _atom_site_aniso_U_11 
 _atom_site_aniso_U_22 
 _atom_site_aniso_U_33 
 _atom_site_aniso_U_23 
 _atom_site_aniso_U_13 
 _atom_site_aniso_U_12 
N1 0.0386(12) 0.0310(11) 0.0417(12) -0.0077(10) 0.0178(10) -0.0084(10) 
O1W 0.0647(13) 0.0356(10) 0.0338(9) -0.0076(8) 0.0085(9) 0.0076(9) 
Li1 0.031(2) 0.042(2) 0.039(2) -0.0013(19) 0.0053(18) 0.0006(19) 
C2 0.073(2) 0.0303(14) 0.0489(16) 0.0039(12) 0.0314(15) 0.0064(14) 
C3 0.0485(17) 0.0520(17) 0.0373(15) 0.0101(13) 0.0124(12) 0.0208(14) 
O4 0.0302(9) 0.0450(10) 0.0357(9) 0.0042(8) 0.0104(7) 0.0005(8) 
C5 0.0328(14) 0.0609(19) 0.0414(15) -0.0063(14) 0.0074(12) -0.0072(13) 
C6 0.0333(14) 0.0592(18) 0.0481(16) -0.0003(14) 0.0135(12) 0.0042(13) 
O7 0.0446(11) 0.0385(10) 0.0401(10) 0.0018(8) 0.0178(8) -0.0027(8) 
C8 0.0502(17) 0.0376(15) 0.0510(17) 0.0017(13) 0.0274(14) -0.0046(13) 
C9 0.0656(19) 0.0358(14) 0.0405(15) 0.0002(12) 0.0304(14) -0.0032(14) 
O10 0.0541(12) 0.0448(11) 0.0283(9) -0.0026(8) 0.0129(8) -0.0025(9) 
C11 0.079(2) 0.0359(15) 0.0298(14) 0.0013(12) 0.0039(14) -0.0060(15) 
C12 0.068(2) 0.067(2) 0.0388(17) 0.0145(17) -0.0120(16) -0.0137(19) 
C19 0.0325(13) 0.0336(13) 0.0364(13) -0.0026(11) 0.0151(11) -0.0035(11) 
C20 0.0250(12) 0.0357(13) 0.0280(12) 0.0016(10) 0.0071(9) -0.0016(10) 
C21 0.0354(13) 0.0371(14) 0.0310(13) -0.0024(11) 0.0059(10) -0.0038(12) 
C22 0.0357(14) 0.0535(17) 0.0290(13) -0.0016(12) 0.0082(11) -0.0059(13) 
C23 0.0455(16) 0.0525(18) 0.0350(14) 0.0113(13) 0.0142(12) -0.0006(14) 
C24 0.0470(16) 0.0370(15) 0.0465(16) 0.0069(13) 0.0203(13) -0.0035(13) 
N25 0.0292(10) 0.0310(11) 0.0275(10) 0.0006(8) 0.0056(8) -0.0001(9) 
C26 0.0480(16) 0.0396(15) 0.0320(13) 0.0014(11) 0.0087(11) -0.0125(13) 
C27 0.0449(16) 0.0554(18) 0.0381(15) 0.0055(13) 0.0072(12) 0.0170(14) 
F1 0.0606(11) 0.0645(11) 0.0492(10) 0.0078(8) 0.0140(8) 0.0286(9) 
F2 0.0444(10) 0.0906(14) 0.0752(13) 0.0011(11) 0.0141(9) -0.0035(10) 
F3 0.0824(13) 0.0482(10) 0.0610(11) -0.0013(9) 0.0119(10) 0.0079(9) 
F4 0.0902(14) 0.0915(14) 0.0319(9) -0.0011(9) 0.0101(9) 0.0236(12) 
B1 0.0479(19) 0.0480(19) 0.0347(16) 0.0014(14) 0.0138(14) 0.0117(16) 
O13 0.053(3) 0.045(3) 0.036(3) -0.008(2) -0.0008(19) -0.013(2) 
C14 0.038(3) 0.067(4) 0.052(3) -0.016(3) -0.008(2) -0.003(3) 
C15 0.033(3) 0.068(4) 0.057(4) -0.009(4) 0.009(3) 0.008(3) 
O16 0.047(3) 0.044(3) 0.039(3) 0.000(2) 0.010(2) -0.007(3) 
C17 0.045(4) 0.057(6) 0.042(5) -0.015(4) 0.016(4) -0.014(5) 
C18 0.056(6) 0.046(5) 0.037(5) -0.012(4) 0.019(4) -0.023(4) 
O13A 0.055(3) 0.043(3) 0.032(3) 0.002(3) -0.006(2) -0.015(3) 
C14A 0.041(4) 0.059(5) 0.054(4) 0.016(4) 0.003(4) -0.002(3) 
C15A 0.039(4) 0.064(4) 0.052(4) 0.018(4) -0.005(3) -0.003(3) 
O16A 0.044(4) 0.029(4) 0.033(3) 0.014(3) 0.002(2) 0.001(3) 
C17A 0.041(4) 0.035(5) 0.036(5) 0.002(3) 0.006(4) -0.004(3) 
C18A 0.029(4) 0.044(5) 0.027(4) 0.000(4) 0.003(4) -0.009(3) 
O2W 0.0576(14) 0.0414(12) 0.0511(13) 0.0070(10) 0.0037(11) -0.0157(12) 
 
_geom_special_details 
; 
 All esds (except the esd in the dihedral angle between two l.s. planes) 
 are estimated using the full covariance matrix.  The cell esds are taken 
 into account individually in the estimation of esds in distances, angles 
 and torsion angles; correlations between esds in cell parameters are only 
 used when they are defined by crystal symmetry.  An approximate (isotropic) 
 treatment of cell esds is used for estimating esds involving l.s. planes. 
; 
 
loop_ 
 _geom_bond_atom_site_label_1 
 _geom_bond_atom_site_label_2 
 _geom_bond_distance 
 _geom_bond_site_symmetry_2 
 _geom_bond_publ_flag 
N1 C18A 1.420(15) . ? 
N1 C19 1.449(3) . ? 
N1 C2 1.471(3) . ? 
N1 C18 1.576(12) . ? 
N1 Li1 2.185(5) . ? 
O1W Li1 1.914(5) . ? 
O1W H1WA 0.9307 . ? 
O1W H1WB 0.8912 . ? 
Li1 O4 2.055(4) . ? 
Li1 O16 2.062(7) . ? 
Li1 N25 2.168(5) . ? 
Li1 O16A 2.345(8) . ? 
C2 C3 1.494(4) . ? 
C2 H2A 0.9900 . ? 
C2 H2B 0.9899 . ? 
C3 O4 1.435(3) . ? 
C3 H3A 0.9899 . ? 
C3 H3B 0.9900 . ? 
O4 C5 1.428(3) . ? 
C5 C6 1.497(4) . ? 
C5 H5A 0.9600 . ? 
C5 H5B 0.9600 . ? 
C6 O7 1.428(3) . ? 
C6 H6A 0.9600 . ? 
C6 H6B 0.9601 . ? 
O7 C8 1.430(3) . ? 
C8 C9 1.481(4) . ? 
C8 H8A 0.9600 . ? 
C8 H8B 0.9599 . ? 
C9 O10 1.429(3) . ? 
C9 H9A 0.9601 . ? 
C9 H9B 0.9600 . ? 
O10 C11 1.418(3) . ? 
C11 C12 1.468(5) . ? 
C11 H11A 0.9901 . ? 
C11 H11B 0.9900 . ? 
C12 O13A 1.390(5) . ? 
C12 O13 1.494(5) . ? 
C12 H12A 0.96(3) . ? 
C12 H12B 1.00(4) . ? 
C19 C20 1.388(3) . ? 
C19 C24 1.397(3) . ? 
C20 C21 1.398(3) . ? 
C20 N25 1.449(3) . ? 
C21 C22 1.381(3) . ? 
C21 H21A 0.9600 . ? 
C22 C23 1.381(4) . ? 
C22 H22A 0.9598 . ? 
C23 C24 1.379(4) . ? 
C23 H23A 0.9601 . ? 
C24 H24A 0.9600 . ? 
N25 C26 1.473(3) . ? 
N25 C27 1.478(3) . ? 
C26 H26C 0.9600 . ? 
C26 H26A 0.9600 . ? 
C26 H26B 0.9600 . ? 
C27 H27A 0.9600 . ? 
C27 H27B 0.9600 . ? 
C27 H27C 0.9600 . ? 
F1 B1 1.385(4) . ? 
F2 B1 1.377(4) . ? 
F3 B1 1.388(4) . ? 
F4 B1 1.376(3) . ? 
O13 C14 1.404(6) . ? 
C14 C15 1.494(6) . ? 
C14 H14A 0.9600 . ? 
C14 H14B 0.9599 . ? 
C14 H14D 1.2701 . ? 
C14 H15D 1.5093 . ? 
C15 O16 1.418(6) . ? 
C15 H15A 0.9600 . ? 
C15 H15B 0.9600 . ? 
C15 H14C 0.9886 . ? 
C15 H15C 1.5343 . ? 
O16 C17 1.431(9) . ? 
C17 C18 1.497(7) . ? 
C17 H17A 0.9600 . ? 
C17 H17B 0.9600 . ? 
C17 H17C 1.2342 . ? 
C17 H17D 1.2839 . ? 
C18 H18A 0.9599 . ? 
C18 H18B 0.9600 . ? 
C18 H18C 1.3982 . ? 
C18 H18D 0.9268 . ? 
O13A C14A 1.441(6) . ? 
C14A C15A 1.507(6) . ? 
C14A H14A 1.3424 . ? 
C14A H15A 1.0627 . ? 
C14A H15B 1.4657 . ? 
C14A H14C 0.9599 . ? 
C14A H14D 0.9600 . ? 
C15A O16A 1.426(6) . ? 
C15A H14B 1.4442 . ? 
C15A H15B 1.2009 . ? 
C15A H17A 1.5586 . ? 
C15A H15C 0.9601 . ? 
C15A H15D 0.9600 . ? 
O16A C17A 1.432(8) . ? 
C17A C18A 1.493(8) . ? 
C17A H17A 1.2077 . ? 
C17A H17B 0.8859 . ? 
C17A H17C 0.9600 . ? 
C17A H17D 0.9600 . ? 
C18A H18A 0.7061 . ? 
C18A H18B 1.2559 . ? 
C18A H18C 0.9600 . ? 
C18A H18D 0.9600 . ? 
O2W H2WA 0.76(5) . ? 
O2W H2WB 0.84(5) . ? 
 
loop_ 
 _geom_angle_atom_site_label_1 
 _geom_angle_atom_site_label_2 
 _geom_angle_atom_site_label_3 
 _geom_angle 
 _geom_angle_site_symmetry_1 
 _geom_angle_site_symmetry_3 
 _geom_angle_publ_flag 
C18A N1 C19 107.3(5) . . ? 
C18A N1 C2 106.9(6) . . ? 
C19 N1 C2 112.6(2) . . ? 
C18A N1 C18 17.9(6) . . ? 
C19 N1 C18 113.4(4) . . ? 
C2 N1 C18 116.8(5) . . ? 
C18A N1 Li1 118.5(4) . . ? 
C19 N1 Li1 109.71(18) . . ? 
C2 N1 Li1 101.81(18) . . ? 
C18 N1 Li1 100.9(4) . . ? 
Li1 O1W H1WA 130.3 . . ? 
Li1 O1W H1WB 124.4 . . ? 
H1WA O1W H1WB 104.4 . . ? 
O1W Li1 O4 98.62(19) . . ? 
O1W Li1 O16 95.0(2) . . ? 
O4 Li1 O16 139.5(3) . . ? 
O1W Li1 N25 99.9(2) . . ? 
O4 Li1 N25 100.77(19) . . ? 
O16 Li1 N25 114.2(3) . . ? 
O1W Li1 N1 179.4(3) . . ? 
O4 Li1 N1 80.82(17) . . ? 
O16 Li1 N1 85.4(2) . . ? 
N25 Li1 N1 80.21(16) . . ? 
O1W Li1 O16A 107.8(2) . . ? 
O4 Li1 O16A 130.2(3) . . ? 
O16 Li1 O16A 13.54(16) . . ? 
N25 Li1 O16A 114.7(3) . . ? 
N1 Li1 O16A 72.59(19) . . ? 
N1 C2 C3 111.1(2) . . ? 
N1 C2 H2A 109.3 . . ? 
C3 C2 H2A 109.4 . . ? 
N1 C2 H2B 109.4 . . ? 
C3 C2 H2B 109.5 . . ? 
H2A C2 H2B 108.0 . . ? 
O4 C3 C2 107.6(2) . . ? 
O4 C3 H3A 110.2 . . ? 
C2 C3 H3A 110.0 . . ? 
O4 C3 H3B 110.5 . . ? 
C2 C3 H3B 110.2 . . ? 
H3A C3 H3B 108.4 . . ? 
C5 O4 C3 114.1(2) . . ? 
C5 O4 Li1 129.2(2) . . ? 
C3 O4 Li1 114.17(18) . . ? 
O4 C5 C6 111.8(2) . . ? 
O4 C5 H5A 109.3 . . ? 
C6 C5 H5A 108.8 . . ? 
O4 C5 H5B 108.7 . . ? 
C6 C5 H5B 110.2 . . ? 
H5A C5 H5B 108.1 . . ? 
O7 C6 C5 112.4(2) . . ? 
O7 C6 H6A 108.7 . . ? 
C5 C6 H6A 109.6 . . ? 
O7 C6 H6B 109.2 . . ? 
C5 C6 H6B 108.8 . . ? 
H6A C6 H6B 108.1 . . ? 
C6 O7 C8 114.1(2) . . ? 
O7 C8 C9 108.4(2) . . ? 
O7 C8 H8A 110.1 . . ? 
C9 C8 H8A 109.8 . . ? 
O7 C8 H8B 109.9 . . ? 
C9 C8 H8B 110.2 . . ? 
H8A C8 H8B 108.5 . . ? 
O10 C9 C8 108.5(2) . . ? 
O10 C9 H9A 110.3 . . ? 
C8 C9 H9A 110.5 . . ? 
O10 C9 H9B 109.4 . . ? 
C8 C9 H9B 109.7 . . ? 
H9A C9 H9B 108.5 . . ? 
C11 O10 C9 113.8(2) . . ? 
O10 C11 C12 109.1(2) . . ? 
O10 C11 H11A 110.1 . . ? 
C12 C11 H11A 110.0 . . ? 
O10 C11 H11B 109.6 . . ? 
C12 C11 H11B 109.8 . . ? 
H11A C11 H11B 108.2 . . ? 
O13A C12 C11 117.3(4) . . ? 
O13A C12 O13 23.4(2) . . ? 
C11 C12 O13 103.2(3) . . ? 
O13A C12 H12A 114.1(18) . . ? 
C11 C12 H12A 111.6(17) . . ? 
O13 C12 H12A 106.8(18) . . ? 
O13A C12 H12B 96.1(19) . . ? 
C11 C12 H12B 112(2) . . ? 
O13 C12 H12B 119.4(19) . . ? 
H12A C12 H12B 104(3) . . ? 
C20 C19 C24 119.5(2) . . ? 
C20 C19 N1 119.4(2) . . ? 
C24 C19 N1 121.1(2) . . ? 
C19 C20 C21 119.3(2) . . ? 
C19 C20 N25 119.1(2) . . ? 
C21 C20 N25 121.6(2) . . ? 
C22 C21 C20 120.6(2) . . ? 
C22 C21 H21A 120.1 . . ? 
C20 C21 H21A 119.4 . . ? 
C23 C22 C21 120.0(2) . . ? 
C23 C22 H22A 120.0 . . ? 
C21 C22 H22A 120.0 . . ? 
C24 C23 C22 119.9(2) . . ? 
C24 C23 H23A 119.9 . . ? 
C22 C23 H23A 120.2 . . ? 
C23 C24 C19 120.7(3) . . ? 
C23 C24 H24A 119.8 . . ? 
C19 C24 H24A 119.5 . . ? 
C20 N25 C26 111.09(18) . . ? 
C20 N25 C27 111.19(18) . . ? 
C26 N25 C27 110.0(2) . . ? 
C20 N25 Li1 110.48(18) . . ? 
C26 N25 Li1 109.04(18) . . ? 
C27 N25 Li1 104.82(19) . . ? 
N25 C26 H26C 109.2 . . ? 
N25 C26 H26A 110.3 . . ? 
H26C C26 H26A 109.1 . . ? 
N25 C26 H26B 110.5 . . ? 
H26C C26 H26B 109.1 . . ? 
H26A C26 H26B 108.6 . . ? 
N25 C27 H27A 109.1 . . ? 
N25 C27 H27B 108.5 . . ? 
H27A C27 H27B 109.5 . . ? 
N25 C27 H27C 110.8 . . ? 
H27A C27 H27C 109.5 . . ? 
H27B C27 H27C 109.5 . . ? 
F4 B1 F2 111.6(3) . . ? 
F4 B1 F1 109.8(2) . . ? 
F2 B1 F1 109.1(2) . . ? 
F4 B1 F3 108.9(2) . . ? 
F2 B1 F3 108.2(2) . . ? 
F1 B1 F3 109.3(3) . . ? 
C14 O13 C12 112.7(5) . . ? 
O13 C14 C15 114.2(4) . . ? 
O13 C14 H14A 109.0 . . ? 
C15 C14 H14A 109.4 . . ? 
O13 C14 H14B 108.3 . . ? 
C15 C14 H14B 108.0 . . ? 
H14A C14 H14B 107.8 . . ? 
O13 C14 H14D 118.4 . . ? 
C15 C14 H14D 70.7 . . ? 
H14A C14 H14D 39.8 . . ? 
H14B C14 H14D 129.3 . . ? 
O13 C14 H15D 121.9 . . ? 
C15 C14 H15D 77.8 . . ? 
H14A C14 H15D 120.1 . . ? 
H14B C14 H15D 30.2 . . ? 
H14D C14 H15D 119.1 . . ? 
O16 C15 C14 113.9(4) . . ? 
O16 C15 H15A 107.0 . . ? 
C14 C15 H15A 108.2 . . ? 
O16 C15 H15B 110.0 . . ? 
C14 C15 H15B 109.7 . . ? 
H15A C15 H15B 107.9 . . ? 
O16 C15 H14C 117.9 . . ? 
C14 C15 H14C 99.8 . . ? 
H15A C15 H14C 11.2 . . ? 
H15B C15 H14C 104.8 . . ? 
O16 C15 H15C 91.1 . . ? 
C14 C15 H15C 92.7 . . ? 
H15A C15 H15C 142.8 . . ? 
H15B C15 H15C 35.0 . . ? 
H14C C15 H15C 139.2 . . ? 
C15 O16 C17 114.8(6) . . ? 
C15 O16 Li1 135.9(4) . . ? 
C17 O16 Li1 108.8(5) . . ? 
O16 C17 C18 108.6(7) . . ? 
O16 C17 H17A 113.4 . . ? 
C18 C17 H17A 109.8 . . ? 
O16 C17 H17B 111.3 . . ? 
C18 C17 H17B 104.0 . . ? 
H17A C17 H17B 109.4 . . ? 
O16 C17 H17C 160.6 . . ? 
C18 C17 H17C 84.1 . . ? 
H17A C17 H17C 47.3 . . ? 
H17B C17 H17C 78.4 . . ? 
O16 C17 H17D 118.9 . . ? 
C18 C17 H17D 82.6 . . ? 
H17A C17 H17D 118.3 . . ? 
H17B C17 H17D 21.4 . . ? 
H17C C17 H17D 76.4 . . ? 
C17 C18 N1 113.9(8) . . ? 
C17 C18 H18A 118.5 . . ? 
N1 C18 H18A 108.0 . . ? 
C17 C18 H18B 101.5 . . ? 
N1 C18 H18B 105.9 . . ? 
H18A C18 H18B 108.0 . . ? 
C17 C18 H18C 127.2 . . ? 
N1 C18 H18C 82.6 . . ? 
H18A C18 H18C 26.1 . . ? 
H18B C18 H18C 122.4 . . ? 
C17 C18 H18D 134.0 . . ? 
N1 C18 H18D 103.7 . . ? 
H18A C18 H18D 70.3 . . ? 
H18B C18 H18D 40.7 . . ? 
H18C C18 H18D 81.8 . . ? 
C12 O13A C14A 118.4(5) . . ? 
O13A C14A C15A 109.4(5) . . ? 
O13A C14A H14A 82.1 . . ? 
C15A C14A H14A 98.6 . . ? 
O13A C14A H15A 107.9 . . ? 
C15A C14A H15A 101.8 . . ? 
H14A C14A H15A 152.4 . . ? 
O13A C14A H15B 155.2 . . ? 
C15A C14A H15B 47.6 . . ? 
H14A C14A H15B 108.0 . . ? 
H15A C14A H15B 73.8 . . ? 
O13A C14A H14C 109.9 . . ? 
C15A C14A H14C 108.9 . . ? 
H14A C14A H14C 143.2 . . ? 
H15A C14A H14C 9.2 . . ? 
H15B C14A H14C 75.9 . . ? 
O13A C14A H14D 109.0 . . ? 
C15A C14A H14D 111.4 . . ? 
H14A C14A H14D 36.9 . . ? 
H15A C14A H14D 117.0 . . ? 
H15B C14A H14D 91.0 . . ? 
H14C C14A H14D 108.2 . . ? 
O16A C15A C14A 111.1(5) . . ? 
O16A C15A H14B 125.5 . . ? 
C14A C15A H14B 75.3 . . ? 
O16A C15A H15B 105.4 . . ? 
C14A C15A H15B 64.4 . . ? 
H14B C15A H15B 123.7 . . ? 
O16A C15A H17A 59.5 . . ? 
C14A C15A H17A 170.6 . . ? 
H14B C15A H17A 110.1 . . ? 
H15B C15A H17A 115.9 . . ? 
O16A C15A H15C 109.8 . . ? 
C14A C15A H15C 108.3 . . ? 
H14B C15A H15C 119.2 . . ? 
H15B C15A H15C 49.4 . . ? 
H17A C15A H15C 76.2 . . ? 
O16A C15A H15D 110.7 . . ? 
C14A C15A H15D 108.8 . . ? 
H14B C15A H15D 33.5 . . ? 
H15B C15A H15D 142.8 . . ? 
H17A C15A H15D 76.8 . . ? 
H15C C15A H15D 108.0 . . ? 
C15A O16A C17A 109.9(6) . . ? 
C15A O16A Li1 138.9(4) . . ? 
C17A O16A Li1 107.9(5) . . ? 
O16A C17A C18A 109.0(8) . . ? 
O16A C17A H17A 67.9 . . ? 
C18A C17A H17A 128.7 . . ? 
O16A C17A H17B 77.9 . . ? 
C18A C17A H17B 135.0 . . ? 
H17A C17A H17B 95.7 . . ? 
O16A C17A H17C 115.8 . . ? 
C18A C17A H17C 115.5 . . ? 
H17A C17A H17C 48.3 . . ? 
H17B C17A H17C 98.9 . . ? 
O16A C17A H17D 101.4 . . ? 
C18A C17A H17D 105.3 . . ? 
H17A C17A H17D 125.8 . . ? 
H17B C17A H17D 32.7 . . ? 
H17C C17A H17D 108.4 . . ? 
N1 C18A C17A 107.8(9) . . ? 
N1 C18A H18A 155.1 . . ? 
C17A C18A H18A 86.6 . . ? 
N1 C18A H18B 100.3 . . ? 
C17A C18A H18B 85.4 . . ? 
H18A C18A H18B 100.9 . . ? 
N1 C18A H18C 110.0 . . ? 
C17A C18A H18C 109.9 . . ? 
H18A C18A H18C 45.2 . . ? 
H18B C18A H18C 138.9 . . ? 
N1 C18A H18D 113.6 . . ? 
C17A C18A H18D 106.5 . . ? 
H18A C18A H18D 79.9 . . ? 
H18B C18A H18D 30.9 . . ? 
H18C C18A H18D 109.0 . . ? 
H2WA O2W H2WB 106(4) . . ? 
 
loop_ 
 _geom_torsion_atom_site_label_1 
 _geom_torsion_atom_site_label_2 
 _geom_torsion_atom_site_label_3 
 _geom_torsion_atom_site_label_4 
 _geom_torsion 
 _geom_torsion_site_symmetry_1 
 _geom_torsion_site_symmetry_2 
 _geom_torsion_site_symmetry_3 
 _geom_torsion_site_symmetry_4 
 _geom_torsion_publ_flag 
C18A N1 Li1 O1W 144(27) . . . . ? 
C19 N1 Li1 O1W -92(27) . . . . ? 
C2 N1 Li1 O1W 28(27) . . . . ? 
C18 N1 Li1 O1W 148(27) . . . . ? 
C18A N1 Li1 O4 142.7(7) . . . . ? 
C19 N1 Li1 O4 -93.60(19) . . . . ? 
C2 N1 Li1 O4 25.9(2) . . . . ? 
C18 N1 Li1 O4 146.5(4) . . . . ? 
C18A N1 Li1 O16 0.9(7) . . . . ? 
C19 N1 Li1 O16 124.6(3) . . . . ? 
C2 N1 Li1 O16 -115.9(3) . . . . ? 
C18 N1 Li1 O16 4.7(5) . . . . ? 
C18A N1 Li1 N25 -114.6(7) . . . . ? 
C19 N1 Li1 N25 9.1(2) . . . . ? 
C2 N1 Li1 N25 128.57(19) . . . . ? 
C18 N1 Li1 N25 -110.8(4) . . . . ? 
C18A N1 Li1 O16A 5.3(7) . . . . ? 
C19 N1 Li1 O16A 129.1(2) . . . . ? 
C2 N1 Li1 O16A -111.5(3) . . . . ? 
C18 N1 Li1 O16A 9.1(5) . . . . ? 
C18A N1 C2 C3 -174.7(4) . . . . ? 
C19 N1 C2 C3 67.7(3) . . . . ? 
C18 N1 C2 C3 -158.5(4) . . . . ? 
Li1 N1 C2 C3 -49.7(3) . . . . ? 
N1 C2 C3 O4 53.5(3) . . . . ? 
C2 C3 O4 C5 168.9(2) . . . . ? 
C2 C3 O4 Li1 -27.6(3) . . . . ? 
O1W Li1 O4 C5 -18.7(3) . . . . ? 
O16 Li1 O4 C5 -127.0(4) . . . . ? 
N25 Li1 O4 C5 83.2(3) . . . . ? 
N1 Li1 O4 C5 161.3(2) . . . . ? 
O16A Li1 O4 C5 -140.9(3) . . . . ? 
O1W Li1 O4 C3 -179.2(2) . . . . ? 
O16 Li1 O4 C3 72.5(4) . . . . ? 
N25 Li1 O4 C3 -77.3(2) . . . . ? 
N1 Li1 O4 C3 0.8(2) . . . . ? 
O16A Li1 O4 C3 58.6(4) . . . . ? 
C3 O4 C5 C6 -89.1(3) . . . . ? 
Li1 O4 C5 C6 110.3(3) . . . . ? 
O4 C5 C6 O7 -66.9(3) . . . . ? 
C5 C6 O7 C8 -82.8(3) . . . . ? 
C6 O7 C8 C9 176.9(2) . . . . ? 
O7 C8 C9 O10 -68.9(3) . . . . ? 
C8 C9 O10 C11 172.2(2) . . . . ? 
C9 O10 C11 C12 -176.3(2) . . . . ? 
O10 C11 C12 O13A 54.8(5) . . . . ? 
O10 C11 C12 O13 74.8(3) . . . . ? 
C18A N1 C19 C20 121.3(6) . . . . ? 
C2 N1 C19 C20 -121.3(2) . . . . ? 
C18 N1 C19 C20 103.3(5) . . . . ? 
Li1 N1 C19 C20 -8.7(3) . . . . ? 
C18A N1 C19 C24 -57.6(6) . . . . ? 
C2 N1 C19 C24 59.7(3) . . . . ? 
C18 N1 C19 C24 -75.7(5) . . . . ? 
Li1 N1 C19 C24 172.4(2) . . . . ? 
C24 C19 C20 C21 1.2(4) . . . . ? 
N1 C19 C20 C21 -177.7(2) . . . . ? 
C24 C19 C20 N25 -179.6(2) . . . . ? 
N1 C19 C20 N25 1.5(3) . . . . ? 
C19 C20 C21 C22 -1.6(4) . . . . ? 
N25 C20 C21 C22 179.2(2) . . . . ? 
C20 C21 C22 C23 1.4(4) . . . . ? 
C21 C22 C23 C24 -0.7(4) . . . . ? 
C22 C23 C24 C19 0.3(4) . . . . ? 
C20 C19 C24 C23 -0.6(4) . . . . ? 
N1 C19 C24 C23 178.3(2) . . . . ? 
C19 C20 N25 C26 127.8(2) . . . . ? 
C21 C20 N25 C26 -53.0(3) . . . . ? 
C19 C20 N25 C27 -109.3(3) . . . . ? 
C21 C20 N25 C27 69.9(3) . . . . ? 
C19 C20 N25 Li1 6.7(3) . . . . ? 
C21 C20 N25 Li1 -174.1(2) . . . . ? 
O1W Li1 N25 C20 170.97(18) . . . . ? 
O4 Li1 N25 C20 70.1(2) . . . . ? 
O16 Li1 N25 C20 -88.9(3) . . . . ? 
N1 Li1 N25 C20 -8.47(19) . . . . ? 
O16A Li1 N25 C20 -74.0(3) . . . . ? 
O1W Li1 N25 C26 48.6(2) . . . . ? 
O4 Li1 N25 C26 -52.2(2) . . . . ? 
O16 Li1 N25 C26 148.7(3) . . . . ? 
N1 Li1 N25 C26 -130.84(18) . . . . ? 
O16A Li1 N25 C26 163.6(2) . . . . ? 
O1W Li1 N25 C27 -69.2(2) . . . . ? 
O4 Li1 N25 C27 -170.01(19) . . . . ? 
O16 Li1 N25 C27 31.0(3) . . . . ? 
N1 Li1 N25 C27 111.39(18) . . . . ? 
O16A Li1 N25 C27 45.8(3) . . . . ? 
O13A C12 O13 C14 -48.8(10) . . . . ? 
C11 C12 O13 C14 -178.9(4) . . . . ? 
C12 O13 C14 C15 78.2(6) . . . . ? 
O13 C14 C15 O16 63.0(7) . . . . ? 
C14 C15 O16 C17 67.4(8) . . . . ? 
C14 C15 O16 Li1 -103.2(7) . . . . ? 
O1W Li1 O16 C15 13.7(7) . . . . ? 
O4 Li1 O16 C15 123.3(6) . . . . ? 
N25 Li1 O16 C15 -89.5(6) . . . . ? 
N1 Li1 O16 C15 -166.6(6) . . . . ? 
O16A Li1 O16 C15 175.0(19) . . . . ? 
O1W Li1 O16 C17 -157.3(5) . . . . ? 
O4 Li1 O16 C17 -47.7(7) . . . . ? 
N25 Li1 O16 C17 99.5(5) . . . . ? 
N1 Li1 O16 C17 22.4(5) . . . . ? 
O16A Li1 O16 C17 4.0(11) . . . . ? 
C15 O16 C17 C18 141.3(7) . . . . ? 
Li1 O16 C17 C18 -45.6(9) . . . . ? 
O16 C17 C18 N1 53.5(10) . . . . ? 
C18A N1 C18 C17 138(3) . . . . ? 
C19 N1 C18 C17 -148.6(6) . . . . ? 
C2 N1 C18 C17 78.0(8) . . . . ? 
Li1 N1 C18 C17 -31.3(8) . . . . ? 
C11 C12 O13A C14A -165.5(6) . . . . ? 
O13 C12 O13A C14A 137.5(15) . . . . ? 
C12 O13A C14A C15A -173.2(5) . . . . ? 
O13A C14A C15A O16A -71.3(9) . . . . ? 
C14A C15A O16A C17A 161.6(7) . . . . ? 
C14A C15A O16A Li1 5.7(11) . . . . ? 
O1W Li1 O16A C15A 0.3(9) . . . . ? 
O4 Li1 O16A C15A 118.8(8) . . . . ? 
O16 Li1 O16A C15A -19.4(10) . . . . ? 
N25 Li1 O16A C15A -110.1(8) . . . . ? 
N1 Li1 O16A C15A 179.9(9) . . . . ? 
O1W Li1 O16A C17A -155.9(6) . . . . ? 
O4 Li1 O16A C17A -37.4(7) . . . . ? 
O16 Li1 O16A C17A -175.5(17) . . . . ? 
N25 Li1 O16A C17A 93.8(6) . . . . ? 
N1 Li1 O16A C17A 23.7(6) . . . . ? 
C15A O16A C17A C18A 148.0(9) . . . . ? 
Li1 O16A C17A C18A -48.4(10) . . . . ? 
C19 N1 C18A C17A -157.1(7) . . . . ? 
C2 N1 C18A C17A 81.9(8) . . . . ? 
C18 N1 C18A C17A -44(2) . . . . ? 
Li1 N1 C18A C17A -32.2(11) . . . . ? 
O16A C17A C18A N1 53.3(12) . . . . ? 
 
loop_ 
 _geom_hbond_atom_site_label_D 
 _geom_hbond_atom_site_label_H 
 _geom_hbond_atom_site_label_A 
 _geom_hbond_distance_DH 
 _geom_hbond_distance_HA 
 _geom_hbond_distance_DA 
 _geom_hbond_angle_DHA 
 _geom_hbond_site_symmetry_A 
O1W H1WB O10  0.89 1.89 2.783(2) 175.4 . 
O2W H2WA O7  0.76(5) 2.07(5) 2.817(3) 169(5) . 
O2W H2WB O13  0.84(5) 1.91(5) 2.740(7) 167(5) . 
O2W H2WB O13A  0.84(5) 2.10(5) 2.939(8) 175(4) . 
O1W H1WA O2W  0.93 1.76 2.686(3) 173.9 2_546 
 
_diffrn_measured_fraction_theta_max    0.997 
_diffrn_reflns_theta_full              27.50 
_diffrn_measured_fraction_theta_full   0.997 
_refine_diff_density_max    0.262 
_refine_diff_density_min   -0.245 
_refine_diff_density_rms    0.045
#===END

data_17�NaBF4 
 
_audit_creation_method            SHELXL 
_chemical_name_systematic 
; 
 ? 
; 
_chemical_name_common             ? 
_chemical_formula_moiety          ? 
_chemical_formula_structural      ? 
_chemical_formula_analytical      ? 
_chemical_formula_sum             'C18 H30 B F4 N2 Na O4' 
_chemical_formula_weight          448.24 
_chemical_melting_point           ? 
_chemical_compound_source         ? 
 
loop_ 
 _atom_type_symbol 
 _atom_type_description 
 _atom_type_scat_dispersion_real 
 _atom_type_scat_dispersion_imag 
 _atom_type_scat_source 
 'C'  'C'   0.0033   0.0016 
 'International Tables Vol C Tables 4.2.6.8 and 6.1.1.4' 
 'H'  'H'   0.0000   0.0000 
 'International Tables Vol C Tables 4.2.6.8 and 6.1.1.4' 
 'B'  'B'   0.0013   0.0007 
 'International Tables Vol C Tables 4.2.6.8 and 6.1.1.4' 
 'N'  'N'   0.0061   0.0033 
 'International Tables Vol C Tables 4.2.6.8 and 6.1.1.4' 
 'O'  'O'   0.0106   0.0060 
 'International Tables Vol C Tables 4.2.6.8 and 6.1.1.4' 
 'F'  'F'   0.0171   0.0103 
 'International Tables Vol C Tables 4.2.6.8 and 6.1.1.4' 
 'Na'  'Na'   0.0362   0.0249 
 'International Tables Vol C Tables 4.2.6.8 and 6.1.1.4' 
 
_symmetry_cell_setting            ? 
_symmetry_space_group_name_H-M    ? 
 
loop_ 
 _symmetry_equiv_pos_as_xyz 
 'x, y, z' 
 '-x+1/2, y+1/2, -z+1/2' 
 '-x, -y, -z' 
 'x-1/2, -y-1/2, z-1/2' 
 
_cell_length_a                    8.161(2) 
_cell_length_b                    12.543(3) 
_cell_length_c                    21.773(4) 
_cell_angle_alpha                 90.00 
_cell_angle_beta                  96.29(3) 
_cell_angle_gamma                 90.00 
_cell_volume                      2215.3(8) 
_cell_formula_units_Z             4 
_cell_measurement_temperature     293(2) 
_cell_measurement_reflns_used     ? 
_cell_measurement_theta_min       ? 
_cell_measurement_theta_max       ? 
 
_exptl_crystal_description        ? 
_exptl_crystal_colour             ? 
_exptl_crystal_size_max           ? 
_exptl_crystal_size_mid           ? 
_exptl_crystal_size_min           ? 
_exptl_crystal_density_meas       ? 
_exptl_crystal_density_diffrn     1.344 
_exptl_crystal_density_method     ? 
_exptl_crystal_F_000              944 
_exptl_absorpt_coefficient_mu     0.131 
_exptl_absorpt_correction_type    ? 
_exptl_absorpt_correction_T_min   ? 
_exptl_absorpt_correction_T_max   ? 
 
_exptl_special_details 
; 
 ? 
; 
 
_diffrn_ambient_temperature       293(2) 
_diffrn_radiation_wavelength      0.71073 
_diffrn_radiation_type            MoK\a 
_diffrn_radiation_source          'fine-focus sealed tube' 
_diffrn_radiation_monochromator   graphite 
_diffrn_measurement_device        ? 
_diffrn_measurement_method        ? 
_diffrn_standards_number          ? 
_diffrn_standards_interval_count  ? 
_diffrn_standards_interval_time   ? 
_diffrn_standards_decay_%         ? 
_diffrn_reflns_number             9768 
_diffrn_reflns_av_R_equivalents   0.0849 
_diffrn_reflns_av_sigmaI/netI     0.0835 
_diffrn_reflns_limit_h_min        -8 
_diffrn_reflns_limit_h_max        9 
_diffrn_reflns_limit_k_min        -13 
_diffrn_reflns_limit_k_max        11 
_diffrn_reflns_limit_l_min        -24 
_diffrn_reflns_limit_l_max        24 
_diffrn_reflns_theta_min          1.88 
_diffrn_reflns_theta_max          23.33 
_reflns_number_total              3185 
_reflns_number_observed           1771 
_reflns_observed_criterion        >2sigma(I) 
 
_computing_data_collection        ? 
_computing_cell_refinement        ? 
_computing_data_reduction         ? 
_computing_structure_solution     'SHELXS-86 (Sheldrick, 1990)' 
_computing_structure_refinement   'SHELXL-93 (Sheldrick, 1993)' 
_computing_molecular_graphics     ? 
_computing_publication_material   ? 
 
_refine_special_details 
; 
 Refinement on F^2^ for ALL reflections except for 0 with very negative F^2^ 
 or flagged by the user for potential systematic errors.  Weighted R-factors 
 wR and all goodnesses of fit S are based on F^2^, conventional R-factors R 
 are based on F, with F set to zero for negative F^2^. The observed criterion 
 of F^2^ > 2sigma(F^2^) is used only for calculating _R_factor_obs etc. and is 
 not relevant to the choice of reflections for refinement.  R-factors based 
 on F^2^ are statistically about twice as large as those based on F, and R- 
 factors based on ALL data will be even larger. 
; 
 
_refine_ls_structure_factor_coef  Fsqd  
_refine_ls_matrix_type            full 
_refine_ls_weighting_scheme 
 'calc w=1/[\s^2^(Fo^2^)+(0.0702P)^2^+0.0000P] where P=(Fo^2^+2Fc^2^)/3' 
_atom_sites_solution_primary      direct 
_atom_sites_solution_secondary    difmap 
_atom_sites_solution_hydrogens    geom 
_refine_ls_hydrogen_treatment     ? 
_refine_ls_extinction_method      none 
_refine_ls_extinction_coef        ? 
_refine_ls_number_reflns          3185 
_refine_ls_number_parameters      289 
_refine_ls_number_restraints      0 
_refine_ls_R_factor_all           0.0977 
_refine_ls_R_factor_obs           0.0520 
_refine_ls_wR_factor_all          0.1517 
_refine_ls_wR_factor_obs          0.1338 
_refine_ls_goodness_of_fit_all    1.001 
_refine_ls_goodness_of_fit_obs    1.229 
_refine_ls_restrained_S_all       1.001 
_refine_ls_restrained_S_obs       1.229 
_refine_ls_shift/esd_max          -0.019 
_refine_ls_shift/esd_mean         0.002 
 
loop_ 
 _atom_site_label 
 _atom_site_type_symbol 
 _atom_site_fract_x 
 _atom_site_fract_y 
 _atom_site_fract_z 
 _atom_site_U_iso_or_equiv 
 _atom_site_thermal_displace_type 
 _atom_site_occupancy 
 _atom_site_calc_flag 
 _atom_site_refinement_flags 
 _atom_site_disorder_group 
Na Na 0.1273(2) 0.42034(10) 0.16012(6) 0.0477(4) Uani 1 d . . 
O4 O 0.1992(3) 0.4725(2) 0.06077(11) 0.0585(7) Uani 1 d . . 
O7 O 0.4129(3) 0.4749(2) 0.16806(13) 0.0692(8) Uani 1 d . . 
O10 O 0.2953(3) 0.3409(2) 0.24795(11) 0.0571(7) Uani 1 d . . 
O13 O -0.0103(3) 0.2785(2) 0.20668(12) 0.0577(7) Uani 1 d . . 
N1 N 0.0585(4) 0.2682(2) 0.08181(13) 0.0488(8) Uani 1 d . . 
N19 N 0.5086(4) -0.0762(2) 0.08903(14) 0.0593(9) Uani 1 d . . 
C2 C 0.0436(6) 0.3255(3) 0.0226(2) 0.0672(12) Uani 1 d . . 
H2A H -0.0495(6) 0.3727(3) 0.0210(2) 0.081 Uiso 1 d R . 
H2B H 0.0243(6) 0.2754(3) -0.0107(2) 0.081 Uiso 1 d R . 
C3 C 0.1916(6) 0.3914(3) 0.0156(2) 0.0662(12) Uani 1 d . . 
H3A H 0.2874(6) 0.3467(3) 0.0227(2) 0.079 Uiso 1 d R . 
H3B H 0.1876(6) 0.4212(3) -0.0251(2) 0.079 Uiso 1 d R . 
C5 C 0.3452(6) 0.5343(4) 0.0667(2) 0.0831(14) Uani 1 d . . 
H5A H 0.3197(6) 0.6037(4) 0.0817(2) 0.100 Uiso 1 d R . 
H5B H 0.3835(6) 0.5429(4) 0.0268(2) 0.100 Uiso 1 d R . 
C6 C 0.4766(5) 0.4871(4) 0.1099(2) 0.0873(15) Uani 1 d . . 
H6A H 0.5064(5) 0.4187(4) 0.0946(2) 0.105 Uiso 1 d R . 
H6B H 0.5727(5) 0.5317(4) 0.1142(2) 0.105 Uiso 1 d R . 
C8 C 0.5223(5) 0.4280(4) 0.2154(2) 0.0757(13) Uani 1 d . . 
H8A H 0.6144(5) 0.4744(4) 0.2265(2) 0.091 Uiso 1 d R . 
H8B H 0.5624(5) 0.3619(4) 0.2007(2) 0.091 Uiso 1 d R . 
C9 C 0.4282(6) 0.4075(3) 0.2692(2) 0.0728(13) Uani 1 d . . 
H9A H 0.4966(6) 0.3735(3) 0.3022(2) 0.087 Uiso 1 d R . 
H9B H 0.3886(6) 0.4737(3) 0.2840(2) 0.087 Uiso 1 d R . 
C11 C 0.1847(5) 0.3198(3) 0.2920(2) 0.0657(11) Uani 1 d . . 
H11A H 0.1254(5) 0.3834(3) 0.3002(2) 0.079 Uiso 1 d R . 
H11B H 0.2424(5) 0.2946(3) 0.3300(2) 0.079 Uiso 1 d R . 
C12 C 0.0667(5) 0.2388(3) 0.2639(2) 0.0703(12) Uani 1 d . . 
H12A H 0.1266(5) 0.1749(3) 0.2568(2) 0.084 Uiso 1 d R . 
H12B H -0.0150(5) 0.2220(3) 0.2910(2) 0.084 Uiso 1 d R . 
C14 C -0.0872(5) 0.1996(3) 0.1671(2) 0.0634(11) Uani 1 d . . 
H14A H -0.1945(5) 0.1840(3) 0.1790(2) 0.076 Uiso 1 d R . 
H14B H -0.0230(5) 0.1353(3) 0.1704(2) 0.076 Uiso 1 d R . 
C15 C -0.1027(5) 0.2390(3) 0.1020(2) 0.0632(11) Uani 1 d . . 
H15A H -0.1518(5) 0.1847(3) 0.0748(2) 0.076 Uiso 1 d R . 
H15B H -0.1739(5) 0.3001(3) 0.0984(2) 0.076 Uiso 1 d R . 
C16 C 0.1713(4) 0.1786(3) 0.0826(2) 0.0449(9) Uani 1 d . . 
C17 C 0.3079(4) 0.1756(3) 0.12568(15) 0.0471(9) Uani 1 d . . 
H17A H 0.3274(4) 0.2337(3) 0.15426(15) 0.056 Uiso 1 d R . 
C18 C 0.4185(4) 0.0929(3) 0.12806(15) 0.0474(9) Uani 1 d . . 
H18A H 0.5116(4) 0.0929(3) 0.15911(15) 0.057 Uiso 1 d R . 
C19 C 0.3973(4) 0.0072(3) 0.0871(2) 0.0443(9) Uani 1 d . . 
C20 C 0.2601(5) 0.0110(3) 0.0434(2) 0.0579(11) Uani 1 d . . 
H20A H 0.2421(5) -0.0463(3) 0.0142(2) 0.069 Uiso 1 d R . 
C21 C 0.1507(5) 0.0951(3) 0.0410(2) 0.0576(11) Uani 1 d . . 
H21A H 0.0575(5) 0.0957(3) 0.0100(2) 0.069 Uiso 1 d R . 
C191 C 0.4770(5) -0.1676(3) 0.0489(2) 0.0678(12) Uani 1 d . . 
H19A H 0.3693(5) -0.1614(3) 0.0266(2) 0.102 Uiso 1 d R . 
H19B H 0.5582(5) -0.1706(3) 0.0202(2) 0.102 Uiso 1 d R . 
H19C H 0.4826(5) -0.2314(3) 0.0734(2) 0.102 Uiso 1 d R . 
C192 C 0.6645(5) -0.0702(3) 0.1265(2) 0.0694(12) Uani 1 d . . 
H19D H 0.6692(5) -0.0060(3) 0.1506(2) 0.104 Uiso 1 d R . 
H19E H 0.6764(5) -0.1308(3) 0.1536(2) 0.104 Uiso 1 d R . 
H19F H 0.7520(5) -0.0700(3) 0.1004(2) 0.104 Uiso 1 d R . 
B B -0.0762(6) 0.6109(4) 0.1732(2) 0.0611(13) Uani 1 d . . 
F1 F -0.1237(3) 0.5177(2) 0.14197(12) 0.0826(8) Uani 1 d . . 
F3 F -0.1636(4) 0.6317(3) 0.2199(2) 0.1566(14) Uani 1 d . . 
F2 F 0.0732(16) 0.5857(11) 0.2060(5) 0.089(4) Uani 0.50 d P 1 
F4 F -0.0415(15) 0.6917(8) 0.1347(5) 0.107(4) Uani 0.50 d P 1 
F2A F 0.0805(17) 0.6067(13) 0.1850(8) 0.177(8) Uani 0.50 d P 2 
F4A F -0.1521(19) 0.6854(12) 0.1376(8) 0.181(7) Uani 0.50 d P 2 
 
loop_ 
 _atom_site_aniso_label 
 _atom_site_aniso_U_11 
 _atom_site_aniso_U_22 
 _atom_site_aniso_U_33 
 _atom_site_aniso_U_23 
 _atom_site_aniso_U_13 
 _atom_site_aniso_U_12 
Na 0.0424(8) 0.0438(8) 0.0567(8) -0.0011(7) 0.0046(6) 0.0011(6) 
O4 0.060(2) 0.056(2) 0.060(2) 0.0016(14) 0.0073(13) -0.0038(14) 
O7 0.045(2) 0.085(2) 0.076(2) 0.010(2) -0.0034(15) -0.0069(15) 
O10 0.063(2) 0.054(2) 0.0526(15) -0.0062(12) 0.0002(14) -0.0052(14) 
O13 0.057(2) 0.0462(15) 0.070(2) 0.0026(14) 0.0076(14) -0.0035(13) 
N1 0.044(2) 0.043(2) 0.056(2) 0.0001(15) -0.0085(15) 0.0045(15) 
N19 0.056(2) 0.047(2) 0.072(2) -0.014(2) -0.005(2) 0.010(2) 
C2 0.086(3) 0.051(2) 0.058(2) -0.002(2) -0.022(2) 0.013(2) 
C3 0.089(3) 0.059(3) 0.050(2) 0.008(2) 0.008(2) 0.010(2) 
C5 0.072(3) 0.096(3) 0.083(3) 0.021(3) 0.013(3) -0.015(3) 
C6 0.053(3) 0.121(4) 0.092(3) 0.022(3) 0.025(3) -0.010(3) 
C8 0.051(3) 0.081(3) 0.090(3) 0.007(3) -0.013(3) -0.010(2) 
C9 0.076(3) 0.063(3) 0.072(3) -0.002(2) -0.026(3) -0.020(2) 
C11 0.076(3) 0.069(3) 0.053(2) -0.001(2) 0.014(2) -0.002(2) 
C12 0.074(3) 0.073(3) 0.066(3) 0.019(2) 0.018(2) -0.002(2) 
C14 0.047(3) 0.054(3) 0.090(3) -0.009(2) 0.009(2) -0.008(2) 
C15 0.045(3) 0.054(2) 0.086(3) -0.013(2) -0.013(2) 0.000(2) 
C16 0.048(2) 0.033(2) 0.050(2) -0.002(2) -0.008(2) 0.002(2) 
C17 0.049(2) 0.041(2) 0.048(2) -0.012(2) -0.007(2) 0.004(2) 
C18 0.045(2) 0.052(2) 0.043(2) -0.006(2) -0.005(2) 0.001(2) 
C19 0.044(2) 0.038(2) 0.050(2) -0.001(2) 0.002(2) -0.002(2) 
C20 0.062(3) 0.045(2) 0.063(2) -0.018(2) -0.011(2) -0.002(2) 
C21 0.053(3) 0.054(2) 0.061(2) -0.014(2) -0.019(2) -0.001(2) 
C191 0.078(3) 0.047(2) 0.079(3) -0.009(2) 0.012(2) 0.012(2) 
C192 0.053(3) 0.057(3) 0.096(3) -0.003(2) -0.004(2) 0.013(2) 
B 0.048(4) 0.070(4) 0.067(3) -0.017(3) 0.018(3) 0.004(3) 
F1 0.061(2) 0.070(2) 0.114(2) -0.0182(15) -0.0050(14) 0.0000(12) 
F3 0.132(3) 0.204(4) 0.146(3) -0.057(3) 0.068(2) 0.014(3) 
F2 0.087(9) 0.077(5) 0.091(4) -0.015(4) -0.048(5) 0.025(5) 
F4 0.195(11) 0.049(5) 0.073(4) 0.015(3) 0.008(6) -0.007(7) 
F2A 0.054(8) 0.156(14) 0.329(20) -0.152(14) 0.054(10) -0.031(7) 
F4A 0.287(17) 0.098(9) 0.148(9) -0.004(6) -0.017(12) 0.107(11) 
 
_geom_special_details 
; 
 All esds (except the esd in the dihedral angle between two l.s. planes) 
 are estimated using the full covariance matrix.  The cell esds are taken 
 into account individually in the estimation of esds in distances, angles 
 and torsion angles; correlations between esds in cell parameters are only 
 used when they are defined by crystal symmetry.  An approximate (isotropic) 
 treatment of cell esds is used for estimating esds involving l.s. planes. 
; 
 
loop_ 
 _geom_bond_atom_site_label_1 
 _geom_bond_atom_site_label_2 
 _geom_bond_distance 
 _geom_bond_site_symmetry_2 
 _geom_bond_publ_flag 
Na F2 2.365(14) . ? 
Na F1 2.381(3) . ? 
Na O13 2.389(3) . ? 
Na O4 2.394(3) . ? 
Na O7 2.417(3) . ? 
Na F2A 2.44(2) . ? 
Na O10 2.440(3) . ? 
Na N1 2.580(3) . ? 
Na B 2.942(5) . ? 
Na C11 3.124(4) . ? 
Na C15 3.127(4) . ? 
O4 C3 1.412(4) . ? 
O4 C5 1.415(5) . ? 
O7 C8 1.415(4) . ? 
O7 C6 1.429(5) . ? 
O10 C9 1.406(4) . ? 
O10 C11 1.412(4) . ? 
O13 C14 1.412(4) . ? 
O13 C12 1.423(4) . ? 
N1 C16 1.452(4) . ? 
N1 C2 1.470(4) . ? 
N1 C15 1.477(5) . ? 
N19 C19 1.383(4) . ? 
N19 C192 1.436(5) . ? 
N19 C191 1.446(4) . ? 
C2 C3 1.485(6) . ? 
C5 C6 1.471(6) . ? 
C8 C9 1.491(6) . ? 
C11 C12 1.485(5) . ? 
C14 C15 1.494(5) . ? 
C16 C17 1.376(4) . ? 
C16 C21 1.383(4) . ? 
C17 C18 1.372(4) . ? 
C18 C19 1.395(4) . ? 
C19 C20 1.390(5) . ? 
C20 C21 1.379(5) . ? 
B F2A 1.277(14) . ? 
B F4A 1.323(14) . ? 
B F3 1.331(5) . ? 
B F4 1.363(12) . ? 
B F2 1.381(12) . ? 
B F1 1.386(5) . ? 
 
loop_ 
 _geom_angle_atom_site_label_1 
 _geom_angle_atom_site_label_2 
 _geom_angle_atom_site_label_3 
 _geom_angle 
 _geom_angle_site_symmetry_1 
 _geom_angle_site_symmetry_3 
 _geom_angle_publ_flag 
F2 Na F1 54.8(3) . . ? 
F2 Na O13 110.8(4) . . ? 
F1 Na O13 90.95(10) . . ? 
F2 Na O4 102.6(3) . . ? 
F1 Na O4 90.08(10) . . ? 
O13 Na O4 139.51(10) . . ? 
F2 Na O7 86.8(3) . . ? 
F1 Na O7 132.22(10) . . ? 
O13 Na O7 132.47(10) . . ? 
O4 Na O7 69.95(10) . . ? 
F1 Na F2A 52.6(3) . . ? 
O13 Na F2A 121.8(4) . . ? 
O4 Na F2A 89.9(5) . . ? 
O7 Na F2A 83.5(3) . . ? 
F2 Na O10 98.1(2) . . ? 
F1 Na O10 137.63(10) . . ? 
O13 Na O10 67.24(9) . . ? 
O4 Na O10 130.36(10) . . ? 
O7 Na O10 66.74(10) . . ? 
F2A Na O10 107.8(4) . . ? 
F2 Na N1 153.0(2) . . ? 
F1 Na N1 98.56(10) . . ? 
O13 Na N1 69.56(10) . . ? 
O4 Na N1 70.27(10) . . ? 
O7 Na N1 113.28(11) . . ? 
F2A Na N1 145.9(4) . . ? 
O10 Na N1 106.19(9) . . ? 
F2 Na B 27.5(3) . . ? 
F1 Na B 27.69(11) . . ? 
O13 Na B 105.53(13) . . ? 
O4 Na B 93.54(13) . . ? 
O7 Na B 108.24(13) . . ? 
F2A Na B 25.3(3) . . ? 
O10 Na B 122.05(13) . . ? 
N1 Na B 125.49(13) . . ? 
F2 Na C11 88.9(3) . . ? 
F1 Na C11 113.53(11) . . ? 
O13 Na C11 48.65(10) . . ? 
O4 Na C11 156.07(11) . . ? 
O7 Na C11 90.13(11) . . ? 
F2A Na C11 101.2(4) . . ? 
O10 Na C11 25.85(9) . . ? 
N1 Na C11 107.98(10) . . ? 
B Na C11 105.58(13) . . ? 
F2 Na C15 132.6(3) . . ? 
F1 Na C15 80.72(10) . . ? 
O13 Na C15 48.75(10) . . ? 
O4 Na C15 91.65(11) . . ? 
O7 Na C15 140.02(11) . . ? 
F2A Na C15 133.3(3) . . ? 
O10 Na C15 106.32(10) . . ? 
N1 Na C15 27.96(10) . . ? 
B Na C15 108.06(13) . . ? 
C11 Na C15 95.83(12) . . ? 
C3 O4 C5 115.5(3) . . ? 
C3 O4 Na 115.8(2) . . ? 
C5 O4 Na 110.8(2) . . ? 
C8 O7 C6 115.4(3) . . ? 
C8 O7 Na 117.4(2) . . ? 
C6 O7 Na 114.1(2) . . ? 
C9 O10 C11 114.6(3) . . ? 
C9 O10 Na 111.2(2) . . ? 
C11 O10 Na 105.2(2) . . ? 
C14 O13 C12 114.4(3) . . ? 
C14 O13 Na 117.4(2) . . ? 
C12 O13 Na 116.7(2) . . ? 
C16 N1 C2 112.4(3) . . ? 
C16 N1 C15 112.9(3) . . ? 
C2 N1 C15 113.0(3) . . ? 
C16 N1 Na 118.2(2) . . ? 
C2 N1 Na 102.1(2) . . ? 
C15 N1 Na 97.1(2) . . ? 
C19 N19 C192 121.0(3) . . ? 
C19 N19 C191 120.6(3) . . ? 
C192 N19 C191 118.2(3) . . ? 
N1 C2 C3 111.8(3) . . ? 
O4 C3 C2 107.7(3) . . ? 
O4 C5 C6 112.6(4) . . ? 
O7 C6 C5 107.4(4) . . ? 
O7 C8 C9 107.8(4) . . ? 
O10 C9 C8 106.9(3) . . ? 
O10 C11 C12 106.4(3) . . ? 
O10 C11 Na 48.9(2) . . ? 
C12 C11 Na 82.7(2) . . ? 
O13 C12 C11 109.0(3) . . ? 
O13 C14 C15 109.5(3) . . ? 
N1 C15 C14 112.2(3) . . ? 
N1 C15 Na 54.9(2) . . ? 
C14 C15 Na 82.6(2) . . ? 
C17 C16 C21 117.2(3) . . ? 
C17 C16 N1 119.6(3) . . ? 
C21 C16 N1 123.2(3) . . ? 
C18 C17 C16 121.8(3) . . ? 
C17 C18 C19 121.6(3) . . ? 
N19 C19 C20 121.6(3) . . ? 
N19 C19 C18 121.9(3) . . ? 
C20 C19 C18 116.5(3) . . ? 
C21 C20 C19 121.4(3) . . ? 
C20 C21 C16 121.5(3) . . ? 
F2A B F4A 122.8(12) . . ? 
F2A B F3 117.6(9) . . ? 
F4A B F3 93.0(8) . . ? 
F3 B F4 119.3(7) . . ? 
F3 B F2 99.5(7) . . ? 
F4 B F2 105.0(8) . . ? 
F2A B F1 106.5(8) . . ? 
F4A B F1 102.7(8) . . ? 
F3 B F1 113.3(4) . . ? 
F4 B F1 113.0(6) . . ? 
F2 B F1 104.1(7) . . ? 
F2A B Na 54.7(7) . . ? 
F4A B Na 138.6(7) . . ? 
F3 B Na 126.0(4) . . ? 
F4 B Na 112.8(6) . . ? 
F2 B Na 52.3(6) . . ? 
F1 B Na 53.0(2) . . ? 
B F1 Na 99.3(3) . . ? 
B F2 Na 100.2(7) . . ? 
B F2A Na 100.0(8) . . ? 
 
_refine_diff_density_max    0.322 
_refine_diff_density_min   -0.233 
_refine_diff_density_rms    0.047
